# Supplementary material for: Predictors of electronic cigarette use among Swedish teenagers: a population-based cohort study
Source: PubMed Central journal article supplement — BMJ Open. 2020 Dec 29;10(12):e040683. doi: 10.1136/bmjopen-2020-040683 (PMC7778771; doi:10.1136/bmjopen-2020-040683), 2020-12-29
Supplement: bmjopen-2020-040683.draft_revisions.pdf [file bmjopen-2020-040683.draft_revisions.pdf]

# BMJ Open

BMJ Open is committed to open peer review. As part of this commitment we make the peer review history of every article we publish publicly available.

When an article is published we post the peer reviewers' comments and the authors' responses online. We also post the versions of the paper that were used during peer review. These are the versions that the peer review comments apply to.

The versions of the paper that follow are the versions that were submitted during the peer review process. They are not the versions of record or the final published versions. They should not be cited or distributed as the published version of this manuscript.

BMJ Open is an open access journal and the full, final, typeset and author-corrected version of record of the manuscript is available on our site with no access controls, subscription charges or pay-per-view fees (<http://bmjopen.bmj.com>).

If you have any questions on BMJ Open's open peer review process please email [info.bmjopen@bmj.com](mailto:info.bmjopen@bmj.com)

# BMJ Open

## Predictors of electronic cigarette use among Swedish teenagers – a population-based cohort study

|                               |                                                                                                                                                                                                                                                                                                                                                                                                                                                                                                                                                                                                                                                                                                                                                                                                                                                                                                                                                                                                           |
|-------------------------------|-----------------------------------------------------------------------------------------------------------------------------------------------------------------------------------------------------------------------------------------------------------------------------------------------------------------------------------------------------------------------------------------------------------------------------------------------------------------------------------------------------------------------------------------------------------------------------------------------------------------------------------------------------------------------------------------------------------------------------------------------------------------------------------------------------------------------------------------------------------------------------------------------------------------------------------------------------------------------------------------------------------|
| Journal:                      | <i>BMJ Open</i>                                                                                                                                                                                                                                                                                                                                                                                                                                                                                                                                                                                                                                                                                                                                                                                                                                                                                                                                                                                           |
| Manuscript ID                 | bmjopen-2020-040683                                                                                                                                                                                                                                                                                                                                                                                                                                                                                                                                                                                                                                                                                                                                                                                                                                                                                                                                                                                       |
| Article Type:                 | Original research                                                                                                                                                                                                                                                                                                                                                                                                                                                                                                                                                                                                                                                                                                                                                                                                                                                                                                                                                                                         |
| Date Submitted by the Author: | 19-May-2020                                                                                                                                                                                                                                                                                                                                                                                                                                                                                                                                                                                                                                                                                                                                                                                                                                                                                                                                                                                               |
| Complete List of Authors:     | Hedman, Linnea; Umeå Universitet Medicinska fakulteten, Department of Public health and clinical medicine, Section of Sustainable Health, The OLIN unit; Luleå university of Technology, Department of Health Science, Division of Nursing<br>Backman, Helena; Umeå Universitet Medicinska fakulteten, Public Health and Clinical Medicine, Section of Sustainable Health; Lulea University of Technology, Department of Health Sciences<br>Stridsman, Caroline; Umeå Universitet Medicinska fakulteten, Department of Public health and clinical medicine, Division of Medicine<br>Lundbäck, Magnus; Karolinska Institutet, Department of clinical sciences, Danderyd Hospital<br>Andersson, Martin; Umeå Universitet Medicinska fakulteten, Department of Public Health and Clinical Medicine, Section of Sustainable health, Umeå University<br>Rönmark, Eva ; Umeå Universitet Medicinska fakulteten, Department of Public health and clinical medicine, Section of Sustainable health, The OLIN unit |
| Keywords:                     | PUBLIC HEALTH, EPIDEMIOLOGY, PREVENTIVE MEDICINE                                                                                                                                                                                                                                                                                                                                                                                                                                                                                                                                                                                                                                                                                                                                                                                                                                                                                                                                                          |
|                               |                                                                                                                                                                                                                                                                                                                                                                                                                                                                                                                                                                                                                                                                                                                                                                                                                                                                                                                                                                                                           |

SCHOLARONE™  
Manuscripts

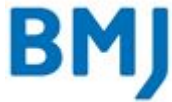

I, the Submitting Author has the right to grant and does grant on behalf of all authors of the Work (as defined in the below author licence), an exclusive licence and/or a non-exclusive licence for contributions from authors who are: i) UK Crown employees; ii) where BMJ has agreed a CC-BY licence shall apply, and/or iii) in accordance with the terms applicable for US Federal Government officers or employees acting as part of their official duties; on a worldwide, perpetual, irrevocable, royalty-free basis to BMJ Publishing Group Ltd ("BMJ") its licensees and where the relevant Journal is co-owned by BMJ to the co-owners of the Journal, to publish the Work in this journal and any other BMJ products and to exploit all rights, as set out in our [licence](#).

The Submitting Author accepts and understands that any supply made under these terms is made by BMJ to the Submitting Author unless you are acting as an employee on behalf of your employer or a postgraduate student of an affiliated institution which is paying any applicable article publishing charge ("APC") for Open Access articles. Where the Submitting Author wishes to make the Work available on an Open Access basis (and intends to pay the relevant APC), the terms of reuse of such Open Access shall be governed by a Creative Commons licence – details of these licences and which [Creative Commons](#) licence will apply to this Work are set out in our licence referred to above.

Other than as permitted in any relevant BMJ Author's Self Archiving Policies, I confirm this Work has not been accepted for publication elsewhere, is not being considered for publication elsewhere and does not duplicate material already published. I confirm all authors consent to publication of this Work and authorise the granting of this licence.

## Predictors of electronic cigarette use among Swedish teenagers – a population-based cohort study

Linnea Hedman<sup>1,2</sup>, Helena Backman<sup>1</sup>, Caroline Stridsman<sup>3</sup>, Magnus Lundbäck<sup>4</sup>, Martin Andersson<sup>1</sup>,  
Eva Rönmark<sup>1</sup>

1. Department of Public Health and Clinical Medicine, Division of Sustainable Health, The OLIN Unit, Umeå University, Umeå, Sweden
2. Department of Health Science, Division of Nursing, Luleå University of Technology, Luleå, Sweden
3. Department of Public Health and Clinical Medicine, Division of Medicine, Umeå University, Umeå, Sweden
4. Karolinska Institutet, Division of Cardiovascular Medicine, Department of Clinical Science, Danderyd University Hospital, Stockholm, Sweden

Corresponding author: Linnea Hedman, Associate professor  
The OLIN studies  
Norrbotten county council  
971 89 Luleå, Sweden  
email: [linnea.hedman@norrbotten.se](mailto:linnea.hedman@norrbotten.se)  
phone: +46 920-284482

Word count: 2940

## Abstract

Objectives: The aim was to identify predictors of e-cigarette use among teenagers.

Design and setting: a prospective population-based cohort study of schoolchildren in northern Sweden.

Participants: In 2006, a cohort study about asthma and allergic diseases among schoolchildren started within the Obstructive Lung Disease in Northern Sweden (OLIN) studies. The study sample (n=2185) was recruited at age 7-8y and participated in questionnaire surveys at age 14-15y, and 19y. The questionnaire included questions about respiratory symptoms, living conditions, upper secondary education, physical activity, diet, health-related quality of life, parental smoking and parental occupation. Questions about tobacco use were included at age 14-15 and 19y.

Primary outcome: E-cigarette use at age 19y.

Results: At age 19y, 21.4% had ever tried e-cigarettes and 4.2% were current users. Among those who were daily tobacco smokers at age 14-15y, 60.9% had tried e-cigarettes at age 19y compared with 19.1% of never-smokers and 34.0% of occasional smokers ( $p<0.001$ ). Among those who had tried e-cigarettes 28.1% were never smokers both at age 14-15 and 19y, and 14.4% were never smokers among the current e-cigarette users. In unadjusted analyses, e-cigarette use was associated with daily smoking, use of snus and having a smoking father at age 14-15y, as well as with attending vocational education, physical inactivity and unhealthy diet. In adjusted analyses, current e-cigarette use was associated with daily tobacco smoking at age 14-15y (OR 6.27 95%CI 3.12-12.58), attending a vocational art program (OR 2.22 95% CI 1.04-4.77), and inversely associated with eating a healthy diet (OR 0.74 95% CI 0.59-0.92).

Conclusions: E-cigarette use was associated with personal and parental tobacco use as well as with physical inactivity, unhealthy diet and attending vocational upper secondary education. Importantly,

1  
2  
3 almost one-third of those who had tried e-cigarettes at age 19 years had never been tobacco  
4  
5 smokers.

6  
7  
8 Keywords: adolescents, electronic cigarettes, epidemiology, smoking, vaping  
9

## 10 11 12 13 14 **Strengths and limitations of this study**

- 15 - This paper presents data from a prospective cohort study with high response rates and few
  - 16 participants lost to follow-up
  - 17 - Self-reported use of tobacco or e-cigarettes was not validated by objective measures
  - 18 - E-cigarette use was measured only at the last follow-up
- 19  
20  
21  
22  
23

## 24 25 **Introduction**

26 In the last ten years, the use of electronic cigarettes (e-cigarettes) has increased rapidly among  
27 teenagers<sup>1-3</sup>, but the increase seems to level off in some countries including England<sup>1</sup> and Sweden<sup>4</sup>.

28  
29 One explanation for their popularity may be that they are perceived as less harmful and less  
30 addictive than tobacco cigarettes<sup>5-7</sup>. Although the levels are considerably lower than in conventional  
31 cigarette smoke, e-cigarette aerosol does contain carcinogenic and toxic substances<sup>8,9</sup> and they can  
32 deliver similar nicotine levels as conventional cigarettes and thereby cause nicotine addiction<sup>10,11</sup>.

33  
34 Because e-cigarettes are portrayed as an alternative to tobacco smoking, studies of predictors for e-  
35 cigarette use have mostly evaluated the association with smoking conventional cigarettes<sup>12,13</sup>. For  
36 instance, e-cigarette use was more common among current smokers than former smokers<sup>14,15</sup> and  
37 younger smokers appear to be more prone to start using e-cigarettes than older smokers<sup>15,16</sup>. A  
38 major concern regarding e-cigarettes is that they also seem to appeal to non-smoking teenagers<sup>17,18</sup>  
39 and might serve as a gateway to initiation of tobacco smoking as well as other drugs<sup>11,17,19</sup>. However,  
40 another explanation for the association between e-cigarette use and tobacco smoking may be that  
41 these behaviors share many risk factors such as social disadvantage, addictive behaviors, low  
42 academic achievement and having family members or friends that smoke<sup>20-24</sup>. These shared  
43 characteristics may serve as a common liability for any tobacco or nicotine product<sup>25,26</sup>, which implies  
44  
45  
46  
47  
48  
49  
50  
51  
52  
53  
54  
55  
56  
57  
58  
59  
60

1  
2  
3 that the sequential order of product initiation is of less importance. Nevertheless, predictors of e-  
4  
5 cigarette use need to be identified both among smoking and non-smoking teenagers but prospective  
6  
7 studies are lacking<sup>27</sup>.  
8  
9

10 The aim of the present study was to identify predictors of e-cigarette use in a prospective  
11  
12 population-based cohort study of teenagers in Sweden followed from 14-15 to 19 years of age.  
13  
14  
15  
16  
17  
18

## 19 **Methods**

### 20 **Study sample**

21  
22 Within the Obstructive Lung Disease in Northern Sweden (OLIN) studies, a population-based  
23  
24 paediatric cohort study has been ongoing since 2006. The starting point was a parental questionnaire  
25  
26 survey inviting all children in first and second grade (age 7-8 years) in three municipalities of  
27  
28 northern Sweden: Luleå, Piteå, and Kiruna<sup>28,29 30</sup>. The cohort was followed-up at age 14-15 years and  
29  
30 19 years. At age 19 years, the study sample consists of the 2,185 individuals that participated in all  
31  
32 surveys, corresponding to 82% of the invited and 78% of the original cohort. The study was approved  
33  
34 by the Regional Ethical Review Board in Umeå, Sweden. At recruitment the parents gave consent for  
35  
36 their child to participate. The participants gave written informed consent at the follow-up at 19  
37  
38 years.  
39  
40  
41  
42

### 43 **Questionnaire**

44  
45 The questionnaire surveys at age 14-15y and 19y were performed at school. The questionnaire  
46  
47 included the International Study of Asthma and Allergies in Childhood (ISAAC) core questionnaire<sup>31</sup>  
48  
49 with additional questions about asthma and allergic diseases including physician diagnoses,  
50  
51 symptoms, use of medicine and heredity<sup>28</sup>. Other questions included possible risk factors such as  
52  
53 living conditions, physical activity, diet, parental smoking and parental occupation. In the  
54  
55 questionnaire at the age of 14-15 years, questions about smoking and use of snus were included<sup>32</sup>  
56  
57 and at age 19 years, questions about e-cigarettes were added. At age 14-15 years, health-related  
58  
59  
60

1  
2  
3 quality of life (HRQoL) was assessed using the KIDSCREEN-10 questionnaire which consists of 10  
4  
5 items with responses on a five-point ordinal scale<sup>33</sup>. The crude values were transformed into a single  
6  
7 score and poor HRQoL was defined as a value lower than the group mean score minus 0.5 standard  
8  
9 deviation.

## 16 Definitions

17  
18 At age 14-15 years and 19 years, respectively, tobacco use was defined based on the questions 'Do  
19  
20 you smoke/use snus?' as *Never* if they smoked/used snus 'Never'; *Occasional*, if they smoked/used  
21  
22 snus 'Almost never', 'Monthly' or 'Weekly'; and *Daily* if they smoked/used snus 'Almost daily' or  
23  
24 'Daily'. At age 19 years, the category Former smoker was also included in the analyses.

25  
26  
27  
28 At age 19 years, e-cigarette use was defined based on the question 'Do you use e-cigarettes?' as *Ever*  
29  
30 *tried e-cigarettes* if they responded 'No, have quit', 'Have only tried', 'Use sometimes' or 'Use daily';  
31  
32 and *Current e-cigarette user* if they responded 'Use sometimes' or 'Use daily'.

33  
34  
35 In Sweden, the upper secondary school education offers three year programs that are vocational or  
36  
37 preparatory for higher education (e.g. economics, natural science, social science or technology). We  
38  
39 divided the vocational programs into *work shop* (e.g. building and construction, electricity, energy,  
40  
41 vehicle, transport or industrial technology), *service* (e.g. child and recreation, hotel and tourism,  
42  
43 restaurant management, or health and social care), and *art* (theater, dance, or music).

44  
45  
46  
47 *Healthy diet* was defined based on a score between 0-4 with one point each for: eating fish every  
48  
49 week; eating a fruit every day; eating fast food less than every week; and drinking soda less than  
50  
51 every week.

52  
53  
54  
55 *Parental socioeconomic status* was based on parental occupation reported in a parentally completed  
56  
57 questionnaire at age 7-8 years, defined according to the socio-economic classification by Statistics  
58  
59 Sweden<sup>34</sup> and categorized into the following groups: manual workers in service, manual workers in



1  
2  
3 industry, assistant non-manual employees, intermediate non-manual employees, self-employed,  
4  
5 unemployed and professionals and executives.  
6  
7

## 8 **Statistical analyses**

9

10  
11 Analyses were performed using the IBM SPSS statistics version 24 (IBM, Armonk, NY). Differences in  
12  
13 proportions between groups were analysed by the Chi square test. A p-value <0.05 was considered  
14  
15 statistically significant. Individuals with missing data in questions about exposure to parental smoking  
16  
17 and tobacco use at age 14-15y, and e-cigarette use at age 19y were excluded from the analyses.  
18  
19 Factors significantly associated with e-cigarette use in unadjusted analyses were included in adjusted  
20  
21 logistic regression models and the results were expressed as odds ratios (OR) with 95% confidence  
22  
23 intervals (CI). The adjusted analyses were also performed among those who were never smokers and  
24  
25 did not use snus at age 14-15 years. A representativeness analysis was performed comparing the  
26  
27 n=2,185 participants at age 19 years with the n=153 individuals that were invited but did not  
28  
29 participate. Participants and non-participants were compared regarding sex, parental smoking habits,  
30  
31 single parent household and prevalence of asthma at recruitment.  
32  
33  
34  
35  
36  
37  
38  
39  
40

## 41 **Results**

### 42 **The prevalence of tobacco use at ages 14-15 and 19 years**

43

44 At age 14-15 years, the majority of the adolescents were never smokers, 90.0% (Table 1). The  
45  
46 prevalence of occasional smoking (7.7% vs. 6.0%) and daily smoking (3.8% vs. 2.6%) was similar in  
47  
48 girls and boys (p=0.083). Daily use of snus was significantly more common among boys than girls,  
49  
50 5.0% vs 0.8%, p<0.001.  
51  
52

53 At age 19 years, 61.8% were never smokers and 8.3% daily smokers. Occasional smoking was more  
54  
55 common among boys than girls, 31.3% vs 25.6%, while daily smoking was more common among girls  
56  
57  
58  
59  
60

1  
2  
3 than boys, 9.3% vs 7.4% ( $p=0.021$ ). Daily use of snus was more common among boys than girls,  
4  
5 22.2% vs 6.2%,  $p<0.001$ .  
6  
7

### 8 **The prevalence of e-cigarette use at age 19 years**

9

10  
11 At age 19 years, 21.4% ( $n=460$ ) of the cohort had ever tried e-cigarettes, with a higher prevalence  
12  
13 among boys than girls, 27.6% vs 15.1%,  $p<0.001$ . Current e-cigarette use ( $n=90$  or 4.2%) was also  
14  
15 more common among boys than girls, 4.9% vs 3.4%, but the difference was not statistically  
16  
17 significant,  $p=0.084$  (Table 1). The prevalence of dual use of e-cigarettes and conventional cigarettes  
18  
19 was 1.7% ( $n=36$ ), dual use of e-cigarettes and snus was 1.3% ( $n=28$ ) while 0.5% ( $n=10$ ) used all three  
20  
21 products.  
22  
23  
24  
25

### 26 **E-cigarette use at age 19 years in relation to tobacco use at age 14-15 years**

27

28 Among those who were daily tobacco smokers at age 14-15 years, 60.9% ( $n=39$ ) had tried e-  
29  
30 cigarettes at age 19 years, compared with 34.0% ( $n=50$ ) among occasional smokers and 19.1%  
31  
32 ( $n=364$ ) among never smokers ( $p<0.001$ ). Of the daily smokers at age 14-15 years, 28.1% ( $n=18$ ) were  
33  
34 current e-cigarette users compared with 7.5% ( $n=11$ ) among occasional smokers and 3.2% ( $n=61$ )  
35  
36 among never smokers (Table 2). Of the current e-cigarette users at age 19 years, 14.4% reported  
37  
38 being never smokers both at age 14-15 years and at 19 years (Figure 1). Corresponding proportion of  
39  
40 never smokers among those who had tried e-cigarettes was 28.5%. Among those who were former  
41  
42 smokers at age 19 years, 24.1% had tried e-cigarettes but only one individual was a current user.  
43  
44  
45

46 The prevalence of e-cigarette use as well as current smoking at age 19 years increased with  
47  
48 increasing number of tobacco smoking family members (Figure 2). Among those with two or more  
49  
50 smoking family members, 33.1% had ever tried e-cigarettes and 8.4% were current users, compared  
51  
52 with 18.7% and 3.3% among those with no smoking family members ( $p<0.001$ ).  
53  
54  
55

### 56 **Predictors of e-cigarette use**

57  
58  
59  
60

1  
2  
3 In unadjusted analyses, current e-cigarette use at age 19 years was associated with daily smoking (OR  
4 10.79 95% CI 5.96-19.53) and use of snus (OR 4.24 95% CI 2.02-8.89) at age 14-15 years. Further, it  
5 was associated with the vocational programs of work shop (OR 2.68 95% CI 1.59-4.49), service (OR  
6 2.15 95% CI 1.01-4.54), and art (OR 2.22 95% CI 1.07-4.58) using preparatory programs as reference  
7 category. E-cigarette use was also associated with poor HRQoL (OR 1.59 95% CI 1.03-2.46), having a  
8 smoking father (OR 2.20 95% CI 1.31-3.68) and inversely associated with physical activity (OR 0.56  
9 95% CI 0.37-0.86) and eating a healthy diet (OR 0.64 95% CI 0.53-0.78). We found no significant  
10 associations between current e-cigarette use and sex, having a smoking mother, physician diagnosis  
11 of asthma, living in a single parent household or parental socioeconomic status at age 14-15 years.  
12  
13

14  
15  
16 In the adjusted analyses, current e-cigarette use remained significantly associated with daily smoking  
17 (OR 6.27 95% CI 3.12-12.58), the vocational program of art (OR 2.22 95% CI 1.04-4.77), and inversely  
18 associated with eating a healthy diet (OR 0.74 95% CI 0.59-0.92) (Figure 3).  
19  
20  
21

22  
23  
24 In analyses stratified by sex, current e-cigarette use among the girls was associated with poor HRQoL  
25 at age 14-15 years (OR 2.92 95% CI 1.25-6.81), the vocational program of art (OR 3.13 95% CI 1.17-  
26 8.34) and inversely associated with eating a healthy diet (OR 0.64 95% CI 0.45-0.91). Among the boys  
27 current e-cigarette use was significantly associated only with daily smoking (OR 5.37 95% CI 1.94-  
28 14.84).  
29  
30  
31

### 32 **Predictors of e-cigarette use among non-tobacco users**

33  
34  
35 Adjusted analyses were also performed among those who were never smokers and did not use snus  
36 at age 14-15 years. Current e-cigarette use at age 19 years was associated with male sex (OR 2.29  
37 95% CI 1.19-4.43) and having a smoking father (OR 2.48 95% CI 1.28-4.81) (Figure 4).  
38  
39  
40

### 41 **Analyses of representativeness**

42  
43  
44 The sex distribution did not differ significantly between participants (n=2,185) and non-participants  
45 (n=153), female sex: 48.5% vs. 41.2%, p=0.081, and there was no difference in the prevalence of  
46  
47  
48  
49  
50  
51  
52  
53  
54  
55  
56  
57  
58  
59  
60

1  
2  
3 asthma, 6.7% vs. 8.0%,  $p=0.564$ . However, compared with the participants, the non-participants  
4  
5 more often had a smoking mother (16.2% vs. 23.7%,  $p<0.017$ ), a smoking father (13.7% vs. 19.6%,  
6  
7  $p=0.046$ ), and lived in a single-parent household (10.5% vs. 17.2%,  $p=0.012$ ) at recruitment.  
8  
9

## 10 11 12 13 14 **Discussion**

15  
16 In this population-based cohort study, daily smoking, use of snus and having a smoking father at age  
17  
18 14-15 years predicted e-cigarette use at age 19 years. Furthermore, e-cigarette use was more  
19  
20 common among boys and less common among teenagers who were physically active and ate a  
21  
22 healthy diet. Among never smokers and non-snus users at age 14-15 years, male sex and having a  
23  
24 smoking father predicted e-cigarette use at age 19 years. Importantly, almost one-third of those who  
25  
26 had tried e-cigarettes at age 19 years had never been smokers.  
27  
28

29  
30 Biologically, teenagers are particularly susceptible to nicotine addiction and it has been shown that  
31  
32 occasional smoking at a young age is associated with greater likelihood of daily smoking and future  
33  
34 nicotine dependence<sup>35,36</sup>. Even occasional smoking is sufficient to develop abstinence symptoms<sup>36</sup>  
35  
36 and may increase the likelihood of trying new nicotine delivery products out of curiosity<sup>37,38</sup>. Thus, we  
37  
38 were not surprised that smoking conventional cigarettes and using snus predicted e-cigarette use in  
39  
40 our study. Although the prevalence of dual use was low in our study, other studies have shown that  
41  
42 the use of multiple tobacco and nicotine products has become more common particularly among  
43  
44 young adults<sup>39</sup>. The different properties and legislation of cigarettes, snus and e-cigarettes enable the  
45  
46 user to choose product depending on the situation. We found that one-fifth of never smokers and  
47  
48 never snus users, respectively, at age 14-15 years had tried e-cigarettes four years later. Notably,  
49  
50 even though the proportion of e-cigarette users was higher among the daily smokers than never  
51  
52 smokers, the absolute number of individuals using e-cigarettes without being a smoker was high in  
53  
54 the cohort. Moreover, almost one-third of e-cigarette users had never been a tobacco user, which is  
55  
56 a cause for concern as the association seems to be bidirectional - it has been shown that e-cigarette  
57  
58  
59  
60

1  
2  
3 use is a predictor of becoming a tobacco smoker<sup>17</sup>. Finally, the teenagers in this cohort did not seem  
4  
5 to use e-cigarettes as a smoking cessation method, as only one former smoker was a current e-  
6  
7 cigarette user. Thus, due to the appeal of e-cigarettes among never smokers, our findings further  
8  
9 undermine the claim that e-cigarettes are a useful harm reduction product.  
10  
11

12  
13 One explanation for the strong appeal of e-cigarettes to non-smoking teenagers may be the plethora  
14  
15 of flavors, including fruits, sweets and desserts<sup>40,41</sup>. In order to make e-cigarettes less appealing it  
16  
17 has been suggested, for instance by the Food And Drug Administration (FDA) in the U.S. that flavors  
18  
19 other than tobacco, mint and menthol should be banned<sup>42</sup>. The prominent taste of conventional  
20  
21 cigarettes and most varieties of Swedish snus may avert teenagers from use. Consequently, e-  
22  
23 cigarettes seem to appeal to new users that may not have initiated tobacco use otherwise,  
24  
25 supporting the gateway theory<sup>19</sup>.  
26  
27  
28  
29  
30

31  
32 In line with other studies, we found that e-cigarette use was more common in boys than girls<sup>23,24,43</sup>.  
33  
34 One explanation may be that teenaged boys have a more risk-taking behavior than girls and  
35  
36 therefore are willing to try a new nicotine delivery product. For a long time, tobacco smoking was  
37  
38 more common among men than women in Sweden, but during the 1990s and 2000s it was more  
39  
40 common among women<sup>44</sup>. It may be that e-cigarette use follows the same pattern as the traditional  
41  
42 tobacco epidemic, with a higher uptake among men in the beginning followed by an increase among  
43  
44 women. Among teenagers, social role modelling may contribute to the choice of tobacco product as  
45  
46 smoking is more common among mothers and daughters, while snus use is more common among  
47  
48 fathers and sons<sup>45,46</sup>. Unfortunately we did not ask for parental e-cigarette use, but we did find that  
49  
50 e-cigarette use was associated with having a smoking father and that it was more common the more  
51  
52 family members that smoked, suggesting that parental smoking habits play an important role for e-  
53  
54 cigarette uptake.  
55  
56  
57  
58  
59  
60

1  
2  
3 We did not find any associations with parental socio-economic status, but e-cigarette use was more  
4  
5 common among teenagers in vocational than preparatory upper secondary education. In Sweden,  
6  
7 the vocational programs mainly lead to jobs within the industry and service, while many attending  
8  
9 preparatory programs continue on to higher education. It is well known that smoking conventional  
10  
11 cigarettes is associated with lower educational level, while studies of e-cigarette use have shown  
12  
13 inconsistent results<sup>27,47</sup>. Nevertheless, our results indicate that the associations between lower  
14  
15 educational level and smoking conventional or electronic cigarettes seen among adults is present  
16  
17 already in early teenage in the choice of education. Moreover, e-cigarette use was less common  
18  
19 among the teenagers who were physically active and ate a healthy diet. Tobacco use, physical  
20  
21 inactivity and unhealthy diet as well as low educational level are known risk factors for public health  
22  
23 diseases, for instance cardiovascular disease, and regrettably, the same individuals often recur in all  
24  
25 of these high-risk groups<sup>48,49</sup>, in accordance with the common liability theory<sup>19,25</sup>. Another interesting  
26  
27 finding was that e-cigarette use was associated with poor HRQoL, particularly among the girls. An  
28  
29 association between HRQoL and tobacco smoking has been demonstrated among teenagers<sup>32</sup>. Thus,  
30  
31 the predictors for e-cigarette use were to a large extent the same as for conventional cigarettes,  
32  
33 which implies that the already available successful tobacco prevention measures only need minor  
34  
35 modifications to also include e-cigarette use. Supporting teenagers to choose a healthy lifestyle  
36  
37 without any tobacco or nicotine products is an important public health effort.  
38  
39  
40  
41  
42  
43  
44  
45  
46

47 The strengths of the study include the prospective study design, with high initial participation rates  
48  
49 and few individuals lost to follow-up. Among those lost to follow-up, there was a higher proportion  
50  
51 of children having smoking parents than among those who participated in the survey at age 19 years.  
52  
53 As having smoking parents and initiation of tobacco use in teenage is strongly correlated, we may  
54  
55 have underestimated the prevalence of tobacco and e-cigarette use. On the other hand, most likely  
56  
57 we have not overestimated the significance of the associations<sup>50</sup>. Tobacco and e-cigarette use was  
58  
59  
60

1  
2  
3 based on self-reports and not verified by objective measures such as level of cotinine. However, the  
4 prevalence of smokers, snus and e-cigarette users were in line with the prevalence in corresponding  
5 ages reported in Swedish national surveys<sup>4</sup>, supporting the external validity of our results. The main  
6 focus of this cohort study is asthma and allergic diseases, therefore we did not include questions  
7 about alcohol intake or other risk-taking behavior in the questionnaire.  
8  
9

10  
11 In conclusion, daily smoking, use of snus and having a smoking father at age 14-15 years predicted e-  
12 cigarette use at age 19 years. Furthermore, e-cigarette use was associated with male sex, physical  
13 inactivity, eating an unhealthy diet and attending vocational upper secondary education. Alarminglly,  
14 almost one-third of those who had tried e-cigarettes at age 19 years had never been smokers or used  
15 snus. Until the effects of e-cigarette use on respiratory and cardiovascular health have been fully  
16 elucidated, the rapid increase of e-cigarette use among teenagers needs to be curbed. In order to  
17 increase the efficacy of intervention efforts, the predictors and pattern of e-cigarette use among  
18 teenagers need to be studied in detail and our study contribute new knowledge in the field.  
19  
20  
21  
22  
23  
24  
25  
26  
27  
28  
29  
30  
31  
32  
33

### 34 **Funding**

35  
36 This work was supported by The Swedish Heart-Lung Foundation, ALF – a regional agreement  
37 between Umeå University and Västerbotten County Council, the Swedish Asthma-Allergy  
38 Foundation, Visare Norr fund: Northern County Council's Regional Federation, and Norrbotten  
39 County Council are acknowledged for financial support. None of the funders had any role in study  
40 design, analysis or interpretation of data, or writing of the manuscript.  
41  
42  
43  
44  
45  
46  
47

### 48 **Acknowledgements**

49  
50 Sigrid Sundberg, Ann-Christin Jonsson, Chatrin Wahlgren and Zandra Lundgren are acknowledged for  
51 data collection.  
52  
53  
54

### 55 **Competing interests**

56  
57 None declared  
58  
59  
60

### Author contributions

LH participated in study design, data collection, performed the statistical analyses, drafted and revised the manuscript and approved the final manuscript. HB, CS, ML and MA contributed to the analyses and interpretation of data, revised the manuscript for important intellectual content and approved the final manuscript. ER is responsible for study conception and study design, participated in data collection, contributed to the analyses and interpretation of data, revised the manuscript for important intellectual content and approved the final manuscript. All authors are accountable for all aspects of the work.

### Data sharing statement

No additional data available.

### Patient and public involvement statement

Patients and/or the public were not involved in the design, or conduct, or reporting or dissemination plans of this research.

### References

1. Hammond D, Reid JL, Rynard VL, et al. Prevalence of vaping and smoking among adolescents in canada, england, and the united states: Repeat national cross sectional surveys. *BMJ*. 2019;365:l2219. Accessed May 5, 2020. doi: 10.1136/bmj.l2219.
2. Kapan A, Stefanac S, Sandner I, Haider S, Grabovac I, Dorner TE. Use of electronic cigarettes in european populations: A narrative review. *Int J Environ Res Public Health*. 2020;17(6). Accessed May 5, 2020. doi: 10.3390/ijerph17061971.
3. Bals R, Boyd J, Esposito S, et al. Electronic cigarettes: A task force report from the european respiratory society. *Eur Respir J*. 2019;53(2). Accessed May 5, 2020. doi: 10.1183/13993003.01151-2018.



- 1  
2  
3 4. The Swedish Council for Information on Alcohol and other drugs, (CAN). Skolelevers drogvanor  
4  
5 2019 (alcohol and drug use among students). report number 187. . 2019.  
6  
7
- 8  
9 5. Ying Xu, Yanfang Guo, Kaiqian Liu, Zheng Liu, Xiaobo Wang. E-cigarette awareness, use, and harm  
10  
11 perception among adults: A meta-analysis of observational studies. *PLoS One*.  
12  
13 2016;11(11):e0165938. <https://www.ncbi.nlm.nih.gov/pubmed/27861501>. doi:  
14  
15 10.1371/journal.pone.0165938.  
16  
17
- 18  
19 6. Glasser AM, Collins L, Pearson JL, et al. Overview of electronic nicotine delivery systems: A  
20  
21 systematic review. *Am J Prev Med*. 2017;52(2):e33-e66. doi: S0749-3797(16)30573-6 [pii].  
22  
23
- 24  
25 7. Kalkhoran S, Alvarado N, Vijayaraghavan M, Lum PJ, Yuan P, Satterfield JM. Patterns of and reasons  
26  
27 for electronic cigarette use in primary care patients. *J Gen Intern Med*. 2017;32(10):1122-1129.  
28  
29 Accessed Apr 8, 2019. doi: 10.1007/s11606-017-4123-x.  
30  
31
- 32  
33 8. Goniewicz ML, Knysak J, Gawron M, et al. Levels of selected carcinogens and toxicants in vapour  
34  
35 from electronic cigarettes. *Tob Control*. 2014;23(2):133-139. Accessed Oct 9, 2017. doi:  
36  
37 10.1136/tobaccocontrol-2012-050859.  
38  
39
- 40  
41 9. Williams M, Villarreal A, Bozhilov K, Lin S, Talbot P. Metal and silicate particles including  
42  
43 nanoparticles are present in electronic cigarette cartomizer fluid and aerosol. *PLoS ONE*.  
44  
45 2013;8(3):e57987. Accessed Oct 9, 2017. doi: 10.1371/journal.pone.0057987.  
46  
47
- 48  
49 10. DeVito EE, Krishnan-Sarin S. E-cigarettes: Impact of E-liquid components and device  
50  
51 characteristics on nicotine exposure. *Curr Neuropharmacol*. 2018;16(4):438-459.  
52  
53 <https://www.ncbi.nlm.nih.gov/pmc/articles/PMC6018193/>. Accessed May 5, 2020. doi:  
54  
55 10.2174/1570159X15666171016164430.  
56  
57  
58  
59  
60

- 1  
2  
3 11. Ren M, Lotfipour S. Nicotine gateway effects on adolescent substance use. *The western journal of*  
4 *emergency medicine*. 2019;20(5):696-709. <https://www.ncbi.nlm.nih.gov/pubmed/31539325>. doi:  
5  
6 10.5811/westjem.2019.7.41661.  
7  
8  
9  
10  
11 12. de Lacy E, Fletcher A, Hewitt G, Murphy S, Moore G. Cross-sectional study examining the  
12 prevalence, correlates and sequencing of electronic cigarette and tobacco use among 11-16-year olds  
13 in schools in wales. *BMJ Open*. 2017;7(2):e012784-012784. doi: 10.1136/bmjopen-2016-012784  
14  
15 [doi].  
16  
17  
18  
19  
20  
21 13. Tavolacci MP, Vasiliu A, Romo L, Kotbagi G, Kern L, Ladner J. Patterns of electronic cigarette use in  
22 current and ever users among college students in france: A cross-sectional study. *BMJ Open*.  
23 2016;6(5):e011344-011344. doi: 10.1136/bmjopen-2016-011344 [doi].  
24  
25  
26  
27  
28  
29 14. Hedman L, Backman H, Stridsman C, et al. Association of electronic cigarette use with smoking  
30 habits, demographic factors, and respiratory symptoms. *JAMA Network Open*. 2018;1(3):e180789.  
31  
32 doi: 10.1001/jamanetworkopen.2018.0789.  
33  
34  
35  
36  
37 15. Vardavas CI, Filippidis FT, Agaku IT. Determinants and prevalence of e-cigarette use throughout  
38 the european union: A secondary analysis of 26 566 youth and adults from 27 countries. *Tob Control*.  
39 2015;24(5):442-448.  
40  
41  
42  
43  
44  
45 16. Li J, Newcombe R, Walton D. The prevalence, correlates and reasons for using electronic  
46 cigarettes among new zealand adults. *Addict Behav*. 2015;45:245-251. Accessed Oct 4, 2017. doi:  
47  
48 10.1016/j.addbeh.2015.02.006.  
49  
50  
51  
52  
53 17. Soneji S, Barrington-Trimis JL, Wills TA, et al. Association between initial use of e-cigarettes and  
54 subsequent cigarette smoking among adolescents and young adults: A systematic review and meta-  
55 analysis. *JAMA Pediatr*. 2017;171(8):788-797. doi: 10.1001/jamapediatrics.2017.1488 [doi].  
56  
57  
58  
59  
60

- 1  
2  
3 18. Barrington-Trimis JL, Urman R, Leventhal AM, et al. E-cigarettes, cigarettes, and the prevalence of  
4 adolescent tobacco use. *Pediatrics*. 2016;138(2):10.1542/peds.2015-3983. Epub 2016 Jul 11. doi:  
5 10.1542/peds.2015-3983 [doi].  
6  
7  
8  
9  
10  
11 19. Etter JF. Gateway effects and electronic cigarettes. *Addiction*. 2018;113(10):1776-1783. doi:  
12 10.1111/add.13924 [doi].  
13  
14  
15  
16 20. Barrington-Trimis JL, Berhane K, Unger JB, et al. Psychosocial factors associated with adolescent  
17 electronic cigarette and cigarette use. *Pediatrics*. 2015;136(2):308-317. doi: 10.1542/peds.2015-0639  
18 [doi].  
19  
20  
21  
22  
23  
24 21. Vogel EA, Ramo DE, Rubinstein ML. Prevalence and correlates of adolescents' e-cigarette use  
25 frequency and dependence. *Drug Alcohol Depend*. 2018;188:109-112. doi: S0376-8716(18)30263-1  
26 [pii].  
27  
28  
29  
30  
31  
32 22. Cardenas VM, Breen PJ, Compadre CM, et al. The smoking habits of the family influence the  
33 uptake of e-cigarettes in US children. *Ann Epidemiol*. 2015;25(1):60-62. doi:  
34 10.1016/j.annepidem.2014.09.013 [doi].  
35  
36  
37  
38  
39  
40 23. Kinnunen JM, Ollila H, Minkkinen J, Lindfors PL, Rimpela AH. A longitudinal study of predictors for  
41 adolescent electronic cigarette experimentation and comparison with conventional smoking. *Int J*  
42 *Environ Res Public Health*. 2018;15(2):10.3390/ijerph15020305. doi: E305 [pii].  
43  
44  
45  
46  
47  
48 24. Babineau K, Taylor K, Clancy L. Electronic cigarette use among irish youth: A cross sectional study  
49 of prevalence and associated factors. *PLoS One*. 2015;10(5):e0126419. doi:  
50 10.1371/journal.pone.0126419 [doi].  
51  
52  
53  
54  
55  
56  
57  
58  
59  
60

- 1  
2  
3 25. Vanyukov MM, Tarter RE, Kirillova GP, et al. Common liability to addiction and "gateway  
4 hypothesis": Theoretical, empirical and evolutionary perspective. *Drug Alcohol Depend.* 2012;123  
5  
6  
7 Suppl 1:3. doi: 10.1016/j.drugalcdep.2011.12.018 [doi].  
8  
9  
10  
11 26. Kim S, Selya AS. The relationship between electronic cigarette use and conventional cigarette  
12 smoking is largely attributable to shared risk factors. *Nicotine Tob Res.* 2019. doi: ntz157 [pii].  
13  
14  
15  
16 27. Hartwell G, Thomas S, Egan M, Gilmore A, Petticrew M. E-cigarettes and equity: A systematic  
17 review of differences in awareness and use between sociodemographic groups. *Tobacco Control.*  
18 2017;26(e2):e85-e91. <https://tobaccocontrol.bmj.com/content/26/e2/e85>. Accessed Sep 2, 2019.  
19  
20  
21  
22  
23  
24  
25  
26  
27 28. Rönmark E, Bjerg A, Perzanowski M, Platts-Mills T, Lundbäck B. Major increase in allergic  
28 sensitization in schoolchildren from 1996 to 2006 in northern sweden. *J Allergy Clin Immunol.*  
29 2009;124:357-363.  
30  
31  
32  
33  
34  
35 29. Bjerg A, Sandström T, Lundbäck B, Rönmark E. Time trends in asthma and wheeze in swedish  
36 children 1996-2006: Prevalence and risk factors by sex. *Allergy.* 2010;65(1):48-55.  
37  
38  
39  
40  
41 30. Bunne J, Moberg H, Hedman L, et al. Increase in allergic sensitization in schoolchildren: Two  
42 cohorts compared 10 years apart. *J Allergy Clin Immunol Pract.* 2017;5(2):457-463.e1. doi: S2213-  
43  
44  
45  
46  
47  
48 31. Asher MI, Keil U, Anderson HR, et al. International study of asthma and allergies in childhood  
49 (ISAAC): Rationale and methods. *Eur Respir J.* 1995;8(3):483-91.  
50  
51  
52  
53  
54 32. Hedman L, Andersson M, Stridsman C, Ronmark E. Evaluation of a tobacco prevention  
55 programme among teenagers in sweden. *BMJ Open.* 2015;5(5):e007673-007673.  
56  
57  
58  
59  
60

- 1  
2  
3 33. Ravens-Sieberer U, Erhart M, Rajmil L, et al. Reliability, construct and criterion validity of the  
4  
5 KIDSCREEN-10 score: A short measure for children and adolescents' well-being and health-related  
6  
7 quality of life. *Qual Life Res.* 2010;19(10):1487-1500.  
8  
9  
10  
11 34. Statistics Sweden. Socio-economic classification. . ;MIS 1982:4.  
12  
13  
14 35. Kendler KS, Myers J, Damaj MI, Chen X. Early smoking onset and risk for subsequent nicotine  
15  
16 dependence: A monozygotic co-twin control study. *Am J Psychiatry.* 2013;170(4):408-413. doi:  
17  
18 10.1176/appi.ajp.2012.12030321 [doi].  
19  
20  
21  
22 36. Siqueira LM, COMMITTEE ON SUBSTANCE USE AND PREVENTION. Nicotine and tobacco as  
23  
24 substances of abuse in children and adolescents. *Pediatrics.* 2017;139(1):10.1542/peds.2016-3436.  
25  
26 doi: e20163436 [pii].  
27  
28  
29  
30 37. Margolis KA, Nguyen AB, Slavik WI, King BA. E-cigarette curiosity among U.S. middle and high  
31  
32 school students: Findings from the 2014 national youth tobacco survey. *Prev Med.* 2016;89:1-6.  
33  
34 Accessed Jun 5, 2019. doi: 10.1016/j.ypmed.2016.05.001.  
35  
36  
37  
38 38. Kinnunen JM, Ollila H, Lindfors PL, Rimpelä AH. Changes in electronic cigarette use from 2013 to  
39  
40 2015 and reasons for use among finnish adolescents. *Int J Environ Res Public Health.* 2016;13(11).  
41  
42 Accessed Jun 5, 2019. doi: 10.3390/ijerph13111114.  
43  
44  
45  
46 39. Osibogun O, Taleb ZB, Bahelah R, Salloum RG, Maziak W. Correlates of poly-tobacco use among  
47  
48 youth and young adults: Findings from the population assessment of tobacco and health study, 2013-  
49  
50 2014. *Drug Alcohol Depend.* 2018;187:160-164. doi: S0376-8716(18)30187-X [pii].  
51  
52  
53  
54 40. Patel D, Davis KC, Cox S, et al. Reasons for current E-cigarette use among U.S. adults. *Prev Med.*  
55  
56 2016;93:14-20. doi: S0091-7435(16)30268-7 [pii].  
57  
58  
59  
60

- 1  
2  
3 41. Publications Office of the European Union. Attitudes of europeans towards tobacco and  
4  
5 electronic cigarettes : Report; special eurobarometer 458. . 2018:1-205.  
6  
7 [https://publications.europa.eu/en/publication-detail/-/publication/2f01a3d1-0af2-11e8-966a-](https://publications.europa.eu/en/publication-detail/-/publication/2f01a3d1-0af2-11e8-966a-01aa75ed71a1/language-en/format-PDF)  
8  
9 [01aa75ed71a1/language-en/format-PDF](https://publications.europa.eu/en/publication-detail/-/publication/2f01a3d1-0af2-11e8-966a-01aa75ed71a1/language-en/format-PDF). Accessed May 28, 2019.  
10  
11  
12  
13 42. Drazen JM, Morrissey S, Campion EW. The dangerous flavors of E-cigarettes. *The New England*  
14  
15 *Journal of Medicine*. 2019;380(7):679-680. <http://dx.doi.org/10.1056/NEJMe1900484>. doi:  
16  
17 10.1056/NEJMe1900484.  
18  
19  
20  
21 43. Farsalinos KE, Poulas K, Voudris V, Le Houezec J. Prevalence and correlates of current daily use of  
22  
23 electronic cigarettes in the european union: Analysis of the 2014 eurobarometer survey. *Intern*  
24  
25 *Emerg Med*. 2017;12(6):757-763. Accessed Oct 10, 2017. doi: 10.1007/s11739-017-1643-7.  
26  
27  
28  
29 44. Backman H, Raisanen P, Hedman L, et al. Increased prevalence of allergic asthma from 1996 to  
30  
31 2006 and further to 2016-results from three population surveys. *Clin Exp Allergy*. 2017;47(11):1426-  
32  
33 1435. doi: 10.1111/cea.12963 [doi].  
34  
35  
36  
37 45. Hedman L, Bjerg A, Perzanowski M, Sundberg S, Rönmark E. Factors related to tobacco use  
38  
39 among teenagers. *Respir Med*. 2007;101(3):496-502.  
40  
41  
42  
43 46. Rosendahl KI, Galanti MR, Ahlbom A. Smoking mothers and snuffing fathers: Behavioural  
44  
45 influences on youth tobacco use in a swedish cohort. *Tobacco Control*. 2003;12:74-78.  
46  
47  
48  
49 47. Hedman L, Backman H, Stridsman C, et al. Association of electronic cigarette use with smoking  
50  
51 habits, demographic factors, and respiratory symptoms. *JAMA Netw Open*. 2018;1(3):e180789. doi:  
52  
53 10.1001/jamanetworkopen.2018.0789 [doi].  
54  
55  
56  
57  
58  
59  
60

- 1  
2  
3 48. Reas DL, Wisting L, Stedal K, Dahlgren CL. Unhealthy eating and weight dissatisfaction in  
4 adolescents who never, occasionally, or regularly use smokeless tobacco (swedish snus). *Int J Eat*  
5 *Disord.* 2019;52(7):846-854. Accessed Aug 29, 2019. doi: 10.1002/eat.23085.  
6  
7  
8  
9  
10  
11 49. Manuel DG, Perez R, Sanmartin C, et al. Measuring burden of unhealthy behaviours using a  
12 multivariable predictive approach: Life expectancy lost in canada attributable to smoking, alcohol,  
13 physical inactivity, and diet. *PLOS Medicine.* 2016;13(8):e1002082.  
14  
15 <https://journals.plos.org/plosmedicine/article?id=10.1371/journal.pmed.1002082>. Accessed Aug 29,  
16 2019. doi: 10.1371/journal.pmed.1002082.  
17  
18  
19  
20  
21  
22  
23 50. Rönmark EP, Ekerljung L, Lötvall J, Torén K, Rönmark E, Lundbäck B. Large scale questionnaire  
24 survey on respiratory health in sweden: Effects of late- and non-response. *Respir Med.*  
25 2009;103:1807-1815.  
26  
27  
28  
29  
30  
31  
32  
33  
34  
35  
36  
37  
38  
39  
40  
41  
42  
43  
44  
45  
46  
47  
48  
49  
50  
51  
52  
53  
54  
55  
56  
57  
58  
59  
60

Table 1. The prevalence of smoking and use of snus at age 14-15 years and 19 years, and e-cigarette use at age 19 years\*.

|                                            | Girls     |      | Boys      |      | Difference<br>by sex,<br>p-value | All       |      |
|--------------------------------------------|-----------|------|-----------|------|----------------------------------|-----------|------|
|                                            | n         | %    | n         | %    |                                  | n         | %    |
| <i>Parental smoking at age 14-15 years</i> |           |      |           |      |                                  |           |      |
| Father smoker                              | 129/1034  | 12.5 | 127/1093  | 11.6 | 0.544                            | 256/2127  | 12.0 |
| Mother smoker                              | 115/1036  | 11.1 | 146/1092  | 13.4 | 0.111                            | 261/2128  | 12.3 |
| <i>Tobacco use at age 14-15 years</i>      |           |      |           |      |                                  |           |      |
| Never smoker                               | 932/1053  | 88.5 | 1012/1108 | 91.3 |                                  | 1944/2161 | 90.0 |
| Occasional smoker                          | 81/1053   | 7.7  | 67/1108   | 6.0  |                                  | 148/2161  | 6.8  |
| Daily smoker                               | 40/1053   | 3.8  | 29/1108   | 2.6  | 0.083                            | 69/2161   | 3.2  |
| Never snus user                            | 1036/1055 | 98.2 | 1034/1109 | 93.2 |                                  | 2070/2164 | 95.7 |
| Occasional snus user                       | 11/1055   | 1.0  | 19/1109   | 1.7  |                                  | 30/2164   | 1.4  |
| Daily snus user                            | 8/1055    | 0.8  | 56/1109   | 5.0  | <0.001                           | 64/2164   | 3.0  |
| <i>Tobacco use at age 19 years</i>         |           |      |           |      |                                  |           |      |
| Never smoker                               | 666/1044  | 63.8 | 662/1105  | 59.9 |                                  | 1328/2149 | 61.8 |
| Former smoker                              | 14/1044   | 1.3  | 15/1105   | 1.4  |                                  | 29/2149   | 1.3  |
| Occasional smoker                          | 267/1044  | 25.6 | 346/1105  | 31.3 |                                  | 613/2149  | 28.5 |
| Daily smoker                               | 97/1044   | 9.3  | 82/1105   | 7.4  | 0.021                            | 179/2149  | 8.3  |
| Daily snus user                            | 65/1052   | 6.2  | 247/1111  | 22.2 | <0.001                           | 312/2163  | 14.4 |
| <i>E-cigarette use at age 19 years</i>     |           |      |           |      |                                  |           |      |
| Ever tried/used e-cigarettes               | 158/1049  | 15.1 | 302/1096  | 27.6 | <0.001                           | 460/2145  | 21.4 |
| Current e-cigarette user                   | 36/1049   | 3.4  | 54/1096   | 4.9  | 0.084                            | 90/2145   | 4.2  |

\*Individuals with missing answers in the individual questions about tobacco use and e-cigarette use were excluded from the analysis.



Table 2. E-cigarette use at the age of 19 years in relation to smoking, use of snus and parental tobacco use at age 14-15 years\*.

|                                            | Ever tried/used e-cigarettes |          |         | Current e-cigarette use |      |         |
|--------------------------------------------|------------------------------|----------|---------|-------------------------|------|---------|
|                                            | n                            | %        | p-value | n                       | %    | p-value |
| <i>Smoking at age 14-15 years</i>          |                              |          |         |                         |      |         |
| Never                                      | 364/1910                     | 19.1     |         | 61/1910                 | 3.2  |         |
| Occasionally                               | 50/147                       | 34.0     |         | 11/147                  | 7.5  |         |
| Daily                                      | 39/64                        | 60.9     | <0.001  | 18/64                   | 28.1 | <0.001  |
| <i>Use of snus at age 14-15 years</i>      |                              |          |         |                         |      |         |
| Never                                      | 405/2035                     | 19.9     |         | 76/2035                 | 3.7  |         |
| Occasionally                               | 16/28                        | 57.1     |         | 5/28                    | 17.9 |         |
| Daily                                      | 31/61                        | 50.8     | <0.001  | 9/61                    | 14.8 | <0.001  |
| <i>Parental smoking at age 14-15 years</i> |                              |          |         |                         |      |         |
| Father smoker                              | No                           | 374/1835 | 20.4    | 69/1835                 | 3.8  |         |
|                                            | Yes                          | 72/253   | 28.5    | 20/253                  | 7.9  | 0.002   |
| Mother smoker                              | No                           | 368/1832 | 20.1    | 73/1832                 | 4.0  |         |
|                                            | Yes                          | 76/256   | 29.7    | 16/256                  | 6.3  | 0.093   |

\*Individuals with missing answers in the individual questions about tobacco use and e-cigarette use were excluded from the analysis.

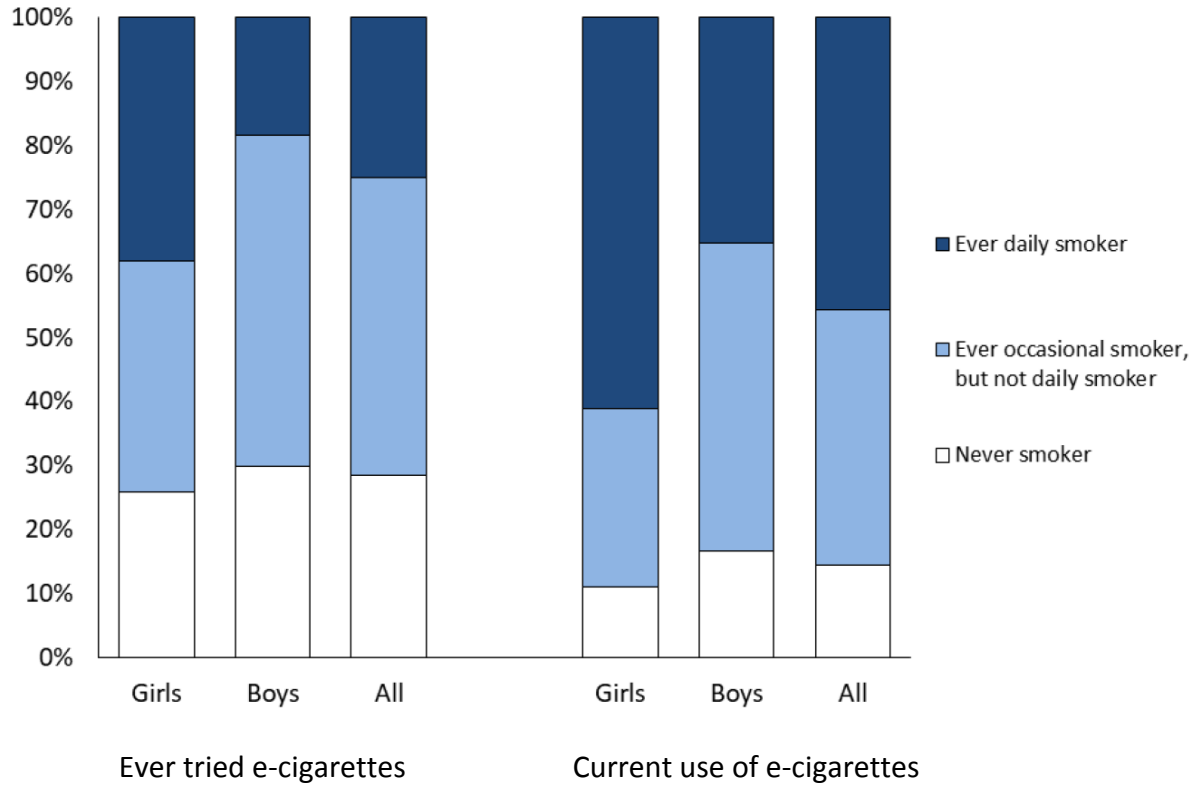

Figure 1. Smoking habits among e-cigarette users, based on questionnaire reports both at age 14-15 years and 19 years. The bars represent all those who had ever tried e-cigarettes and all current e-cigarette users at age 19 years, respectively.

1  
2  
3  
4  
5  
6  
7  
8  
9  
10  
11  
12  
13  
14  
15  
16  
17  
18  
19  
20  
21  
22  
23  
24  
25  
26  
27  
28  
29  
30  
31  
32  
33  
34  
35  
36  
37  
38  
39  
40  
41

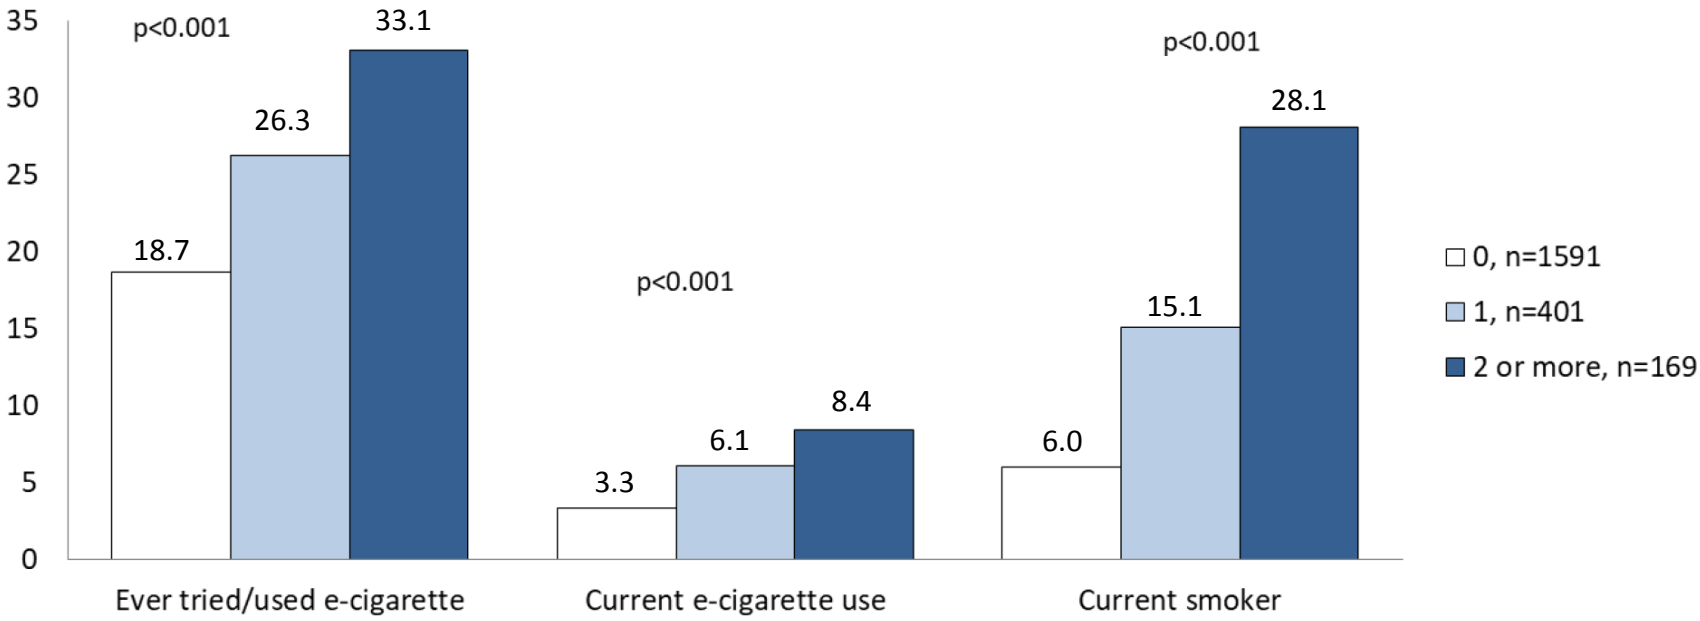

Figure 2. The prevalence of ever and current e-cigarette use and current tobacco smoking at age 19 years in relation to number of smoking family members at age 14-15 years.

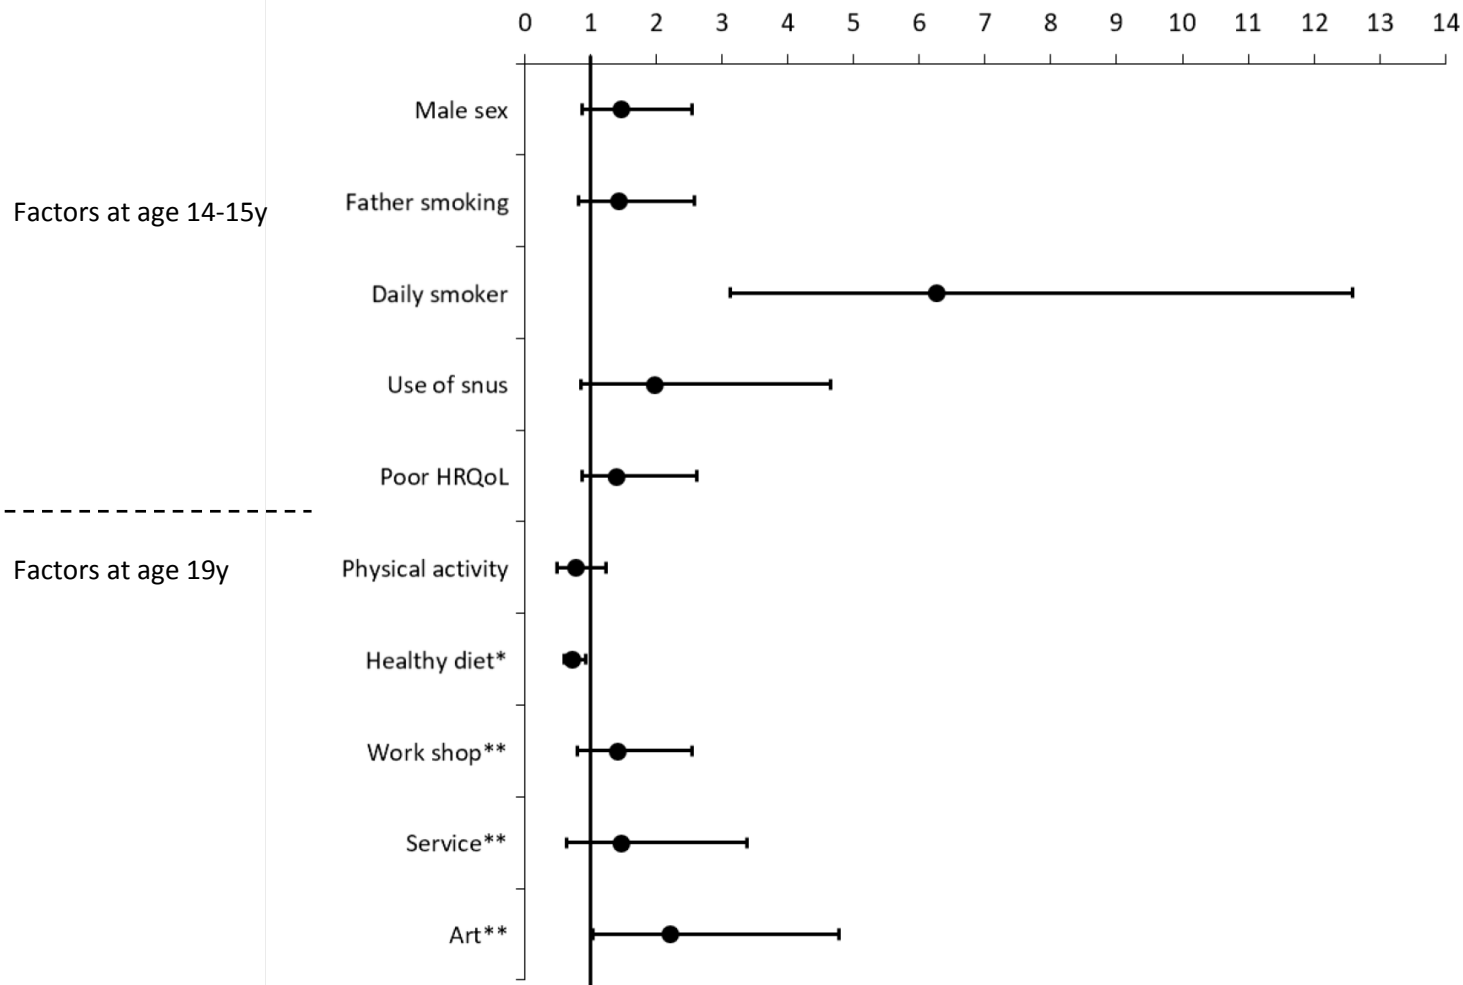

Figure 3. Risk factors for current e-cigarette use at age 19 years, analysed in an adjusted logistic regression analysis (including all factors listed in the figure) with the result expressed as odds ratios with 95% confidence intervals.

\*Entered as a continuous variable (score 0-4)

\*\*Upper secondary education, reference category: preparatory education

HRQoL: health-related quality of life For peer review only - <http://bmjopen.bmj.com/site/about/guidelines.xhtml>

40

41

1  
2  
3  
4  
5  
6  
7  
8  
9  
10  
11  
12  
13  
14  
15  
16  
17  
18  
19  
20  
21  
22  
23  
24  
25  
26  
27  
28  
29  
30  
31  
32  
33  
34  
35  
36  
37  
38  
39  
40  
41

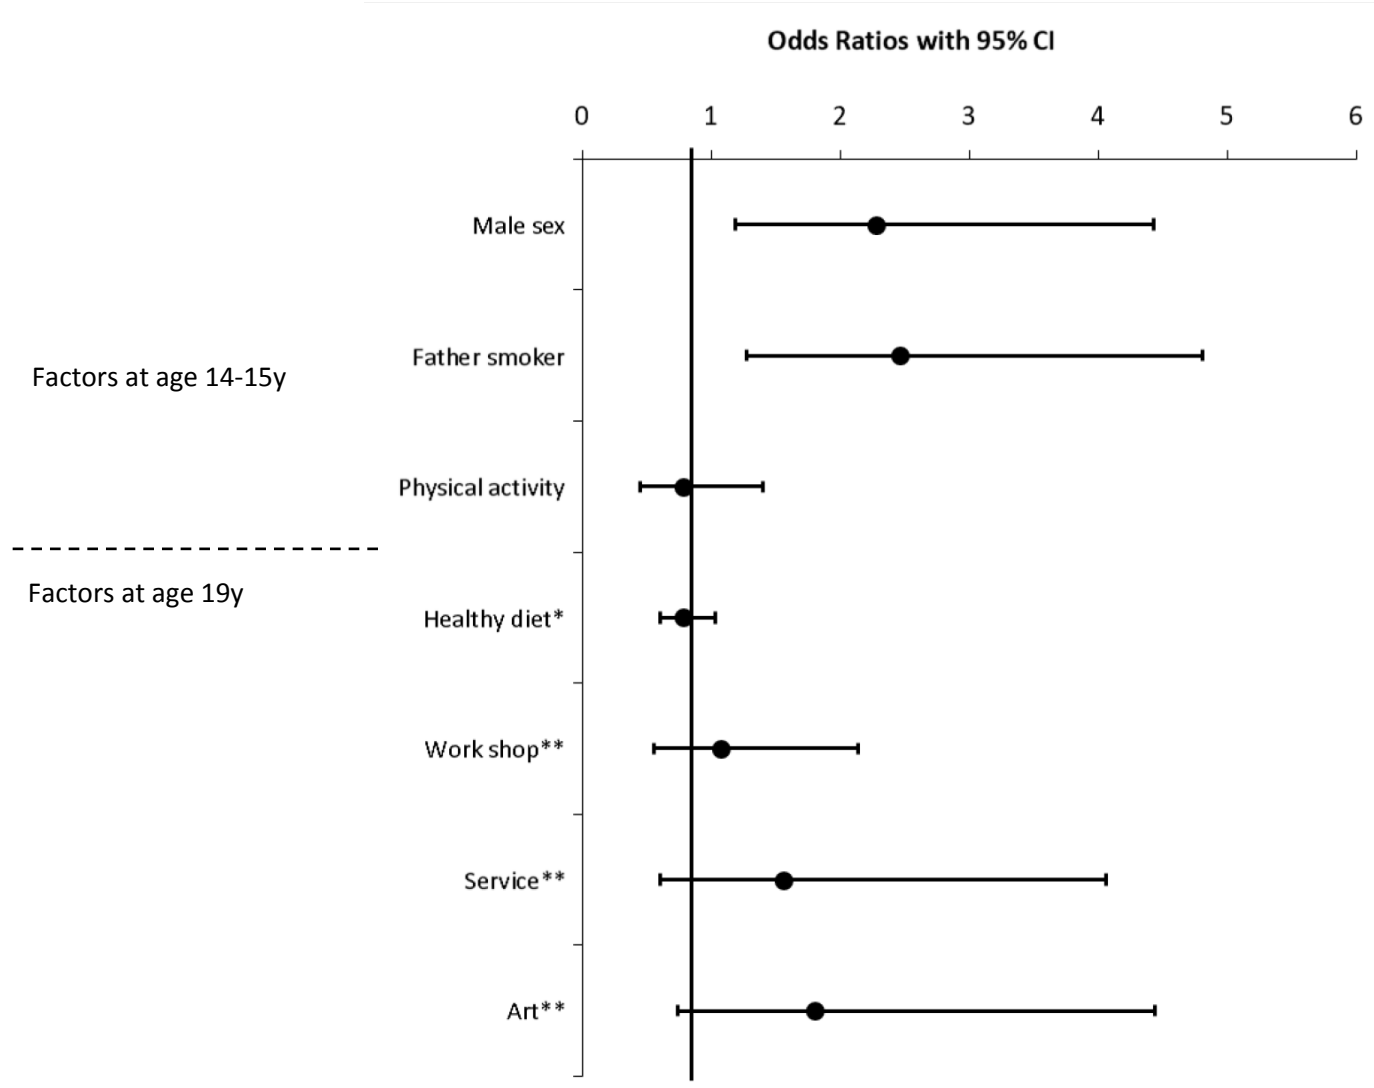

Figure 4. Risk factors for current e-cigarette use at age 19 years among the teenagers who were never-smokers and did not use snus at age 14-15 years, analysed in an adjusted logistic regression analysis (including all factors listed in the figure) with the results expressed as odds ratios with 95% confidence intervals.

\* Entered as a continuous variable (score 0-4)

\*\*Upper secondary education, reference category: preparatory education

**STROBE 2007 (v4) Statement—Checklist of items that should be included in reports of *cohort studies***

| Section/Topic                | Item # | Recommendation                                                                                                                                                                       | Reported on page #                         |
|------------------------------|--------|--------------------------------------------------------------------------------------------------------------------------------------------------------------------------------------|--------------------------------------------|
| <b>Title and abstract</b>    | 1      | (a) Indicate the study's design with a commonly used term in the title or the abstract                                                                                               | 1 and 2                                    |
|                              |        | (b) Provide in the abstract an informative and balanced summary of what was done and what was found                                                                                  | 2                                          |
| <b>Introduction</b>          |        |                                                                                                                                                                                      |                                            |
| Background/rationale         | 2      | Explain the scientific background and rationale for the investigation being reported                                                                                                 | 3-4                                        |
| Objectives                   | 3      | State specific objectives, including any prespecified hypotheses                                                                                                                     | 4                                          |
| <b>Methods</b>               |        |                                                                                                                                                                                      |                                            |
| Study design                 | 4      | Present key elements of study design early in the paper                                                                                                                              | 4; Study sample                            |
| Setting                      | 5      | Describe the setting, locations, and relevant dates, including periods of recruitment, exposure, follow-up, and data collection                                                      | 4; Study sample                            |
| Participants                 | 6      | (a) Give the eligibility criteria, and the sources and methods of selection of participants. Describe methods of follow-up                                                           | 4; Study sample                            |
|                              |        | (b) For matched studies, give matching criteria and number of exposed and unexposed                                                                                                  | NA                                         |
| Variables                    | 7      | Clearly define all outcomes, exposures, predictors, potential confounders, and effect modifiers. Give diagnostic criteria, if applicable                                             | 4; Questionnaire<br>5; Definitions         |
| Data sources/<br>measurement | 8*     | For each variable of interest, give sources of data and details of methods of assessment (measurement). Describe comparability of assessment methods if there is more than one group | 4; Questionnaire<br>5; Definitions         |
| Bias                         | 9      | Describe any efforts to address potential sources of bias                                                                                                                            | 6; Statistical analyses                    |
| Study size                   | 10     | Explain how the study size was arrived at                                                                                                                                            | 4; Study sample<br>6; Statistical analyses |
| Quantitative variables       | 11     | Explain how quantitative variables were handled in the analyses. If applicable, describe which groupings were chosen and why                                                         | 6; Statistical analyses                    |
| Statistical methods          | 12     | (a) Describe all statistical methods, including those used to control for confounding                                                                                                | 6; Statistical analyses                    |
|                              |        | (b) Describe any methods used to examine subgroups and interactions                                                                                                                  | 6; Statistical analyses                    |
|                              |        | (c) Explain how missing data were addressed                                                                                                                                          | 6; Statistical analyses                    |
|                              |        | (d) If applicable, explain how loss to follow-up was addressed                                                                                                                       | 6; Statistical analyses                    |
|                              |        | (e) Describe any sensitivity analyses                                                                                                                                                | NA                                         |

|                          |     |                                                                                                                                                                                                              |                                                                                   |
|--------------------------|-----|--------------------------------------------------------------------------------------------------------------------------------------------------------------------------------------------------------------|-----------------------------------------------------------------------------------|
| <b>Results</b>           |     |                                                                                                                                                                                                              |                                                                                   |
| Participants             | 13* | (a) Report numbers of individuals at each stage of study—eg numbers potentially eligible, examined for eligibility, confirmed eligible, included in the study, completing follow-up, and analysed            | 4; Study sample<br>6; Statistical analyses<br>7-8; Analyses of representativeness |
|                          |     | (b) Give reasons for non-participation at each stage                                                                                                                                                         | 7-8; Analyses of representativeness                                               |
|                          |     | (c) Consider use of a flow diagram                                                                                                                                                                           | NA                                                                                |
| Descriptive data         | 14* | (a) Give characteristics of study participants (eg demographic, clinical, social) and information on exposures and potential confounders                                                                     | Table 1<br>6: The prevalence of tobacco use at ages 14-15 and 19 years            |
|                          |     | (b) Indicate number of participants with missing data for each variable of interest                                                                                                                          | Table 1<br>Table 2                                                                |
|                          |     | (c) Summarise follow-up time (eg, average and total amount)                                                                                                                                                  | 4; Study sample                                                                   |
| Outcome data             | 15* | Report numbers of outcome events or summary measures over time                                                                                                                                               | Table 1                                                                           |
| Main results             | 16  | (a) Give unadjusted estimates and, if applicable, confounder-adjusted estimates and their precision (eg, 95% confidence interval). Make clear which confounders were adjusted for and why they were included | Table 2<br>Figure 3<br>Figure 4                                                   |
|                          |     | (b) Report category boundaries when continuous variables were categorized                                                                                                                                    | NA                                                                                |
|                          |     | (c) If relevant, consider translating estimates of relative risk into absolute risk for a meaningful time period                                                                                             | NA                                                                                |
| Other analyses           | 17  | Report other analyses done—eg analyses of subgroups and interactions, and sensitivity analyses                                                                                                               | Figure 4                                                                          |
| <b>Discussion</b>        |     |                                                                                                                                                                                                              |                                                                                   |
| Key results              | 18  | Summarise key results with reference to study objectives                                                                                                                                                     | 10; Discussion                                                                    |
| <b>Limitations</b>       |     |                                                                                                                                                                                                              |                                                                                   |
| Interpretation           | 20  | Give a cautious overall interpretation of results considering objectives, limitations, multiplicity of analyses, results from similar studies, and other relevant evidence                                   | 10-12                                                                             |
| Generalisability         | 21  | Discuss the generalisability (external validity) of the study results                                                                                                                                        | 12                                                                                |
| <b>Other information</b> |     |                                                                                                                                                                                                              |                                                                                   |

|         |    |                                                                                                                                                               |             |
|---------|----|---------------------------------------------------------------------------------------------------------------------------------------------------------------|-------------|
| Funding | 22 | Give the source of funding and the role of the funders for the present study and, if applicable, for the original study on which the present article is based | 13; Funding |
|---------|----|---------------------------------------------------------------------------------------------------------------------------------------------------------------|-------------|

\*Give information separately for cases and controls in case-control studies and, if applicable, for exposed and unexposed groups in cohort and cross-sectional studies.

**Note:** An Explanation and Elaboration article discusses each checklist item and gives methodological background and published examples of transparent reporting. The STROBE checklist is best used in conjunction with this article (freely available on the Web sites of PLoS Medicine at <http://www.plosmedicine.org/>, Annals of Internal Medicine at <http://www.annals.org/>, and Epidemiology at <http://www.epidem.com/>). Information on the STROBE Initiative is available at [www.strobe-statement.org](http://www.strobe-statement.org).

For peer review only



# BMJ Open

## Predictors of electronic cigarette use among Swedish teenagers – a population-based cohort study

|                                 |                                                                                                                                                                                                                                                                                                                                                                                                                                                                                                                                                                                                                                                                                                                                                                                                                                                                                                                                                                                    |
|---------------------------------|------------------------------------------------------------------------------------------------------------------------------------------------------------------------------------------------------------------------------------------------------------------------------------------------------------------------------------------------------------------------------------------------------------------------------------------------------------------------------------------------------------------------------------------------------------------------------------------------------------------------------------------------------------------------------------------------------------------------------------------------------------------------------------------------------------------------------------------------------------------------------------------------------------------------------------------------------------------------------------|
| Journal:                        | <i>BMJ Open</i>                                                                                                                                                                                                                                                                                                                                                                                                                                                                                                                                                                                                                                                                                                                                                                                                                                                                                                                                                                    |
| Manuscript ID                   | bmjopen-2020-040683.R1                                                                                                                                                                                                                                                                                                                                                                                                                                                                                                                                                                                                                                                                                                                                                                                                                                                                                                                                                             |
| Article Type:                   | Original research                                                                                                                                                                                                                                                                                                                                                                                                                                                                                                                                                                                                                                                                                                                                                                                                                                                                                                                                                                  |
| Date Submitted by the Author:   | 06-Oct-2020                                                                                                                                                                                                                                                                                                                                                                                                                                                                                                                                                                                                                                                                                                                                                                                                                                                                                                                                                                        |
| Complete List of Authors:       | Hedman, Linnea; Umeå Universitet Medicinska fakulteten, Department of Public health and clinical medicine, Section of Sustainable Health, The OLIN unit; Luleå university of Technology, Department of Health Science, Division of Nursing<br>Backman, Helena; Umeå Universitet Medicinska fakulteten, Public Health and Clinical Medicine, Section of Sustainable Health; Lulea University of Technology, Department of Health Sciences<br>Stridsman, Caroline; Umeå Universitet Medicinska fakulteten, Department of Public health and clinical medicine, Division of Medicine<br>Lundbäck, Magnus; Karolinska Institutet, Department of clinical sciences, Danderyd Hospital<br>Andersson, Martin; Umeå Universitet Medicinska fakulteten, Department of Public Health and Clinical Medicine, Section of Sustainable health, Umeå University<br>Rönmark, Eva ; Umeå University, Department of Public Health and Clinical Medicine, Section of Sustainable Health, The OLIN unit |
| <b>Primary Subject Heading</b>: | Smoking and tobacco                                                                                                                                                                                                                                                                                                                                                                                                                                                                                                                                                                                                                                                                                                                                                                                                                                                                                                                                                                |
| Secondary Subject Heading:      | Public health                                                                                                                                                                                                                                                                                                                                                                                                                                                                                                                                                                                                                                                                                                                                                                                                                                                                                                                                                                      |
| Keywords:                       | PUBLIC HEALTH, EPIDEMIOLOGY, PREVENTIVE MEDICINE                                                                                                                                                                                                                                                                                                                                                                                                                                                                                                                                                                                                                                                                                                                                                                                                                                                                                                                                   |
|                                 |                                                                                                                                                                                                                                                                                                                                                                                                                                                                                                                                                                                                                                                                                                                                                                                                                                                                                                                                                                                    |

SCHOLARONE™  
Manuscripts



I, the Submitting Author has the right to grant and does grant on behalf of all authors of the Work (as defined in the below author licence), an exclusive licence and/or a non-exclusive licence for contributions from authors who are: i) UK Crown employees; ii) where BMJ has agreed a CC-BY licence shall apply, and/or iii) in accordance with the terms applicable for US Federal Government officers or employees acting as part of their official duties; on a worldwide, perpetual, irrevocable, royalty-free basis to BMJ Publishing Group Ltd ("BMJ") its licensees and where the relevant Journal is co-owned by BMJ to the co-owners of the Journal, to publish the Work in this journal and any other BMJ products and to exploit all rights, as set out in our [licence](#).

The Submitting Author accepts and understands that any supply made under these terms is made by BMJ to the Submitting Author unless you are acting as an employee on behalf of your employer or a postgraduate student of an affiliated institution which is paying any applicable article publishing charge ("APC") for Open Access articles. Where the Submitting Author wishes to make the Work available on an Open Access basis (and intends to pay the relevant APC), the terms of reuse of such Open Access shall be governed by a Creative Commons licence – details of these licences and which [Creative Commons](#) licence will apply to this Work are set out in our licence referred to above.

Other than as permitted in any relevant BMJ Author's Self Archiving Policies, I confirm this Work has not been accepted for publication elsewhere, is not being considered for publication elsewhere and does not duplicate material already published. I confirm all authors consent to publication of this Work and authorise the granting of this licence.

## Predictors of electronic cigarette use among Swedish teenagers – a population-based cohort study

Linnea Hedman<sup>1,2</sup>, Helena Backman<sup>1</sup>, Caroline Stridsman<sup>3</sup>, Magnus Lundbäck<sup>4</sup>, Martin Andersson<sup>1</sup>,  
Eva Rönmark<sup>1</sup>

1. Department of Public Health and Clinical Medicine, Division of Sustainable Health, The OLIN Unit, Umeå University, Umeå, Sweden
2. Department of Health Science, Division of Nursing, Luleå University of Technology, Luleå, Sweden
3. Department of Public Health and Clinical Medicine, Division of Medicine, Umeå University, Umeå, Sweden
4. Karolinska Institutet, Division of Cardiovascular Medicine, Department of Clinical Science, Danderyd University Hospital, Stockholm, Sweden

Corresponding author: Linnea Hedman, Associate professor  
The OLIN studies  
Norrbotten county council  
971 89 Luleå, Sweden  
email: [linnea.hedman@norrboten.se](mailto:linnea.hedman@norrboten.se)  
phone: +46 920-284482

Word count: 3050

## Abstract

Objectives: The aim was to identify predictors of e-cigarette use among teenagers.

Design and setting: a prospective population-based cohort study of schoolchildren in northern Sweden.

Participants: In 2006, a cohort study about asthma and allergic diseases among schoolchildren started within the Obstructive Lung Disease in Northern Sweden (OLIN) studies. The study sample (n=2185) was recruited at age 7-8y and participated in questionnaire surveys at age 14-15y, and 19y. The questionnaire included questions about respiratory symptoms, living conditions, upper secondary education, physical activity, diet, health-related quality of life, parental smoking and parental occupation. Questions about tobacco use were included at age 14-15 and 19y.

Primary outcome: E-cigarette use at age 19y.

Results: At age 19y, 21.4% had ever tried e-cigarettes and 4.2% were current users. Among those who were daily tobacco smokers at age 14-15y, 60.9% had tried e-cigarettes at age 19y compared with 19.1% of never-smokers and 34.0% of occasional smokers (p<0.001). Among those who had tried e-cigarettes 28.1% were never smokers both at age 14-15 and 19y, and 14.4% were never smokers among the current e-cigarette users. In unadjusted analyses, e-cigarette use was associated with daily smoking, use of snus and having a smoking father at age 14-15y, as well as with attending vocational education, physical inactivity and unhealthy diet. In adjusted analyses, current e-cigarette use was associated with daily tobacco smoking at age 14-15y (OR 6.27 95%CI 3.12-12.58), attending a vocational art program (OR 2.22 95% CI 1.04-4.77), and inversely associated with eating a healthy diet (OR 0.74 95% CI 0.59-0.92).

Conclusions: E-cigarette use was associated with personal and parental tobacco use as well as with physical inactivity, unhealthy diet and attending vocational upper secondary education. Importantly,

1  
2  
3 almost one-third of those who had tried e-cigarettes at age 19 years had never been tobacco  
4  
5 smokers.  
6  
7

8 Keywords: adolescents, electronic cigarettes, epidemiology, smoking, vaping  
9  
10  
11  
12  
13

## 14 **Strengths and limitations of this study**

- 16 - This paper presents data from a prospective cohort study with high response rates and few  
17 participants lost to follow-up
- 18 - Self-reported use of tobacco or e-cigarettes was not validated by objective measures
- 19 - E-cigarette use was measured only at the last follow-up  
20  
21  
22  
23

## 24 **Introduction**

25 In the last ten years, the use of electronic cigarettes (e-cigarettes) has increased rapidly among  
26 teenagers<sup>1-3</sup>, but the increase seems to level off in some countries including England<sup>1</sup> and Sweden<sup>4</sup>.  
27  
28

29 One explanation for their popularity may be that they are perceived as less harmful and less  
30 addictive than tobacco cigarettes<sup>5-7</sup>. Although the levels are considerably lower than in conventional  
31 cigarette smoke, e-cigarette aerosol does contain carcinogenic and toxic substances<sup>8,9</sup> and they can  
32 deliver similar nicotine levels as conventional cigarettes and thereby cause nicotine addiction<sup>10,11</sup>.  
33  
34  
35  
36  
37  
38

39 Because e-cigarettes are portrayed as an alternative to tobacco smoking, studies of predictors for e-  
40 cigarette use have mostly evaluated the association with smoking conventional cigarettes<sup>12,13</sup>. For  
41 instance, e-cigarette use was more common among current smokers than former smokers<sup>14,15</sup> and  
42 younger smokers appear to be more prone to start using e-cigarettes than older smokers<sup>15,16</sup>. A  
43 major concern regarding e-cigarettes is that they also seem to appeal to non-smoking teenagers<sup>17,18</sup>  
44 and might serve as a gateway to initiation of tobacco smoking as well as other drugs<sup>11,17,19</sup>. However,  
45 another explanation for the association between e-cigarette use and tobacco smoking may be that  
46 these behaviors share many risk factors such as social disadvantage, addictive behaviors, low  
47 academic achievement and having family members or friends that smoke<sup>20-24</sup>. These shared  
48 characteristics may serve as a common liability for any tobacco or nicotine product<sup>25,26</sup>, which implies  
49  
50  
51  
52  
53  
54  
55  
56  
57  
58  
59  
60

1  
2  
3 that the sequential order of product initiation is of less importance. Nevertheless, predictors of e-  
4  
5 cigarette use need to be identified both among smoking and non-smoking teenagers but prospective  
6  
7 studies are lacking. In Sweden, smoking is more common among women while the use of snus  
8  
9 (smokeless, moist, grounded tobacco placed under the upper lip) and e-cigarettes is more common  
10  
11 among men<sup>14,27-29</sup>, but there are no epidemiological studies on sex differences in e-cigarette use  
12  
13 among Swedish teenagers<sup>4</sup>.  
14  
15

16  
17 The aim of the present study was to identify predictors of e-cigarette use in a prospective  
18  
19 population-based cohort study of teenagers in Sweden followed from 14-15 to 19 years of age.  
20  
21  
22  
23  
24

## 25 26 **Methods**

### 27 **Study sample**

28  
29 Within the Obstructive Lung Disease in Northern Sweden (OLIN) studies, a population-based  
30  
31 paediatric cohort study has been ongoing since 2006. The starting point was a parental questionnaire  
32  
33 survey inviting all children in first and second grade (age 7-8 years) in three municipalities of  
34  
35 northern Sweden: Luleå, Piteå, and Kiruna<sup>30-32</sup>. The cohort was followed-up at age 14-15 years and 19  
36  
37 years. At age 19 years, the study sample consists of the 2,185 individuals that participated in all  
38  
39 surveys, corresponding to 82% of the invited and 78% of the original cohort (n=2819). The study was  
40  
41 approved by the Regional Ethical Review Board in Umeå, Sweden. At recruitment the parents gave  
42  
43 consent for their child to participate. The participants gave written informed consent at the follow-up  
44  
45 at 19 years.  
46  
47  
48  
49  
50  
51  
52

### 53 **Patient and Public Involvement**

54  
55 Patients and/or the public were not involved in the design, or conduct, or reporting or dissemination  
56  
57 plans of this research.  
58  
59  
60

## Questionnaire

The questionnaire surveys at age 14-15y and 19y were performed at school. The questionnaire included the International Study of Asthma and Allergies in Childhood (ISAAC) core questionnaire<sup>33</sup> with additional questions about asthma and allergic diseases including physician diagnoses, symptoms, use of medicine and heredity<sup>30</sup>. Other questions included possible risk factors such as living conditions, physical activity, diet, parental smoking and parental occupation. In the questionnaire at the age of 14-15 years, questions about smoking and use of snus were included<sup>34</sup> and at age 19 years, questions about e-cigarettes were added. At age 14-15 years, health-related quality of life (HRQoL) was assessed using the KIDSCREEN-10 questionnaire which consists of 10 items with responses on a five-point ordinal scale<sup>35</sup>. The crude values were transformed into a single score and poor HRQoL was defined as a value lower than the group mean score minus 0.5 standard deviation.

## Definitions

At age 14-15 years and 19 years, respectively, tobacco use was defined based on the questions 'Do you smoke/use snus?' as *Never* if they smoked/used snus 'Never'; *Occasional*, if they smoked/used snus 'Almost never', 'Monthly' or 'Weekly'; and *Daily* if they smoked/used snus 'Almost daily' or 'Daily'. At age 19 years, the category Former smoker was also included in the analyses. Former smoker was defined as either self-reported former smoker in the questionnaire at age 19y, or reporting being an occasional or daily smoker at age 14-15y and non-smoker at age 19y.

At age 19 years, e-cigarette use was defined based on the question 'Do you use e-cigarettes?' as *Ever tried e-cigarettes* if they responded 'No, have quit', 'Have only tried', 'Use sometimes' or 'Use daily'; and *Current e-cigarette user* if they responded 'Use sometimes' or 'Use daily'.

1  
2  
3 In Sweden, the upper secondary school education offers three year programs that are vocational or  
4 preparatory for higher education (e.g. economics, natural science, social science or technology). The  
5 program is chosen at age 15 years and they attend the program until graduation at age 19 years. We  
6 divided the vocational programs into *work shop* (e.g. building and construction, electricity, energy,  
7 vehicle, transport or industrial technology), *service* (e.g. child and recreation, hotel and tourism,  
8 restaurant management, or health and social care), and *art* (theater, dance, or music).  
9

10  
11  
12  
13  
14  
15  
16  
17 *Healthy diet* was defined based on a score between 0-4 with one point each for: eating fish every  
18 week; eating a fruit every day; eating fast food less than every week; and drinking soda less than  
19 every week. These four items were chosen based on recommendations by the Swedish National Food  
20 Agency.  
21  
22  
23  
24  
25

26  
27 *Physical activity* was defined as regular participation in sports or physical activity, not including  
28 physical education at school  
29  
30

31  
32 *Parental socioeconomic status* was based on parental occupation reported in a parentally completed  
33 questionnaire at age 7-8 years, defined according to the socio-economic classification by Statistics  
34 Sweden<sup>36</sup> and categorized into the following groups: manual workers in service, manual workers in  
35 industry, assistant non-manual employees, intermediate non-manual employees, self-employed,  
36 unemployed and professionals and executives.  
37  
38  
39  
40  
41  
42  
43

#### 44 **Statistical analyses**

45  
46  
47 Analyses were performed using the IBM SPSS statistics version 24 (IBM, Armonk, NY). Differences in  
48 proportions between groups were analysed by the Chi square test. A p-value <0.05 was considered  
49 statistically significant. Individuals with missing data in questions about exposure to parental smoking  
50 (2.7%), tobacco use at age 14-15y (0.97-1.1%) and 19y (1.0-1.7%), and e-cigarette use at age 19y  
51 (1.8%) were excluded from the analyses. Factors significantly associated with e-cigarette use in  
52 unadjusted analyses were included in adjusted logistic regression models. Sex was also included in  
53  
54  
55  
56  
57  
58  
59  
60



1  
2  
3 the analysis. The results were expressed as odds ratios (OR) with 95% confidence intervals (CI). The  
4  
5 adjusted analyses were also performed among those who were never smokers and did not use snus  
6  
7 at age 14-15 years. A representativeness analysis was performed comparing the n=2,185 individuals  
8  
9 that participated in the follow-up surveys both at 14-15 years and 19 years with the n=634  
10  
11 individuals that did not participate in the follow-ups surveys. Participants and non-participants were  
12  
13 compared regarding sex, parental smoking habits, single parent household and prevalence of asthma  
14  
15 at recruitment.  
16  
17  
18  
19  
20  
21  
22

## 23 **Results**

### 24 **The prevalence of tobacco use at ages 14-15 and 19 years**

25  
26 At age 14-15 years, the majority of the adolescents were never smokers, 90.0% (Table 1). The  
27  
28 prevalence of occasional smoking was 6.8% and 3.2% were daily smokers, with similar prevalence in  
29  
30 girls and boys. Daily use of snus was significantly more common among boys than girls, 5.0% vs 0.8%,  
31  
32  $p<0.001$ .  
33  
34  
35

36 At age 19 years, 61.8% were never smokers and 8.3% daily smokers. Occasional smoking was more  
37  
38 common among boys than girls, 31.3% vs 25.6%, while daily smoking was more common among girls  
39  
40 than boys, 9.3% vs 7.4% ( $p=0.021$ ). Daily use of snus had increased to 14.4% and was still more  
41  
42 common among boys.  
43  
44  
45

### 46 **The prevalence of e-cigarette use at age 19 years**

47  
48  
49 At age 19 years, 21.4% (n=460) of the cohort had ever tried e-cigarettes, with a higher prevalence  
50  
51 among boys than girls, 27.6% vs 15.1%,  $p<0.001$ , and 4.2% (n=90) were current e-cigarette users. The  
52  
53 prevalence of dual use of e-cigarettes and conventional cigarettes was 1.7% (n=36), dual use of e-  
54  
55 cigarettes and snus was 1.3% (n=28) while 0.5% (n=10) used all three products.  
56  
57  
58

### 59 **E-cigarette use at age 19 years in relation to tobacco use at age 14-15 years**

1  
2  
3 Among those who were daily tobacco smokers at age 14-15 years, 60.9% (n=39) had tried e-  
4  
5 cigarettes at age 19 years, compared with 34.0% (n=50) among occasional smokers and 19.1%  
6  
7 (n=364) among never smokers ( $p<0.001$ ). Of the daily smokers at age 14-15 years, 28.1% (n=18) were  
8  
9 current e-cigarette users compared with 7.5% (n=11) among occasional smokers and 3.2% (n=61)  
10  
11 among never smokers (Table 2). Of the current e-cigarette users at age 19 years, 14.4% reported  
12  
13 being never smokers both at age 14-15 years and at 19 years (Figure 1). Corresponding proportion of  
14  
15 never smokers among those who had tried e-cigarettes was 28.5%. Among those who were former  
16  
17 smokers at age 19 years, 24.1% (n=7) had tried e-cigarettes but only one individual was a current  
18  
19 user. At age 19 years, there were 13 individuals reported having quit using e-cigarettes. Of them, 10  
20  
21 were occasional smokers, 2 daily smokers, 1 never smoker but none of them was a former smoker.  
22  
23  
24  
25  
26 The prevalence of e-cigarette use as well as current smoking at age 19 years increased with  
27  
28 increasing number of tobacco smoking family members (Figure 2). Among those with two or more  
29  
30 smoking family members, 33.1% had ever tried e-cigarettes and 8.4% were current users, compared  
31  
32 with 18.7% and 3.3% among those with no smoking family members ( $p<0.001$ ).  
33  
34  
35

### 36 **Predictors of e-cigarette use**

37  
38 Unadjusted analyses are presented in an online supplement, Table E1. Current e-cigarette use at age  
39  
40 19 years was associated with occasional and daily smoking, and use of snus at age 14-15 years.  
41  
42 Further, it was associated with the vocational programs of work shop, service, and art using  
43  
44 preparatory programs as reference category. E-cigarette use was also associated with poor HRQoL ,  
45  
46 having a smoking father and inversely associated with physical activity and eating a healthy diet.  
47  
48  
49

50 In the adjusted analyses, current e-cigarette use remained significantly associated with daily smoking  
51  
52 (OR 6.27 95% CI 3.12-12.58), the vocational program of art (OR 2.22 95% CI 1.04-4.77), and inversely  
53  
54 associated with eating a healthy diet (OR 0.74 95% CI 0.59-0.92) (Figure 3).  
55  
56

57 In analyses stratified by sex, current e-cigarette use among the girls was associated with poor HRQoL  
58  
59 at age 14-15 years (OR 2.92 95% CI 1.25-6.81), the vocational program of art (OR 3.13 95% CI 1.17-  
60

1  
2  
3 8.34) and inversely associated with eating a healthy diet (OR 0.64 95% CI 0.45-0.91). Among the boys  
4  
5 current e-cigarette use was significantly associated only with daily smoking (OR 5.37 95% CI 1.94-  
6  
7 14.84).  
8  
9

### 10 **Predictors of e-cigarette use among non-tobacco users**

11  
12  
13 Adjusted analyses were also performed among those who were never smokers and did not use snus  
14  
15 at age 14-15 years, n=1827. Current e-cigarette use at age 19 years was associated with male sex (OR  
16  
17 2.00 95% CI 1.06-3.77) and having a smoking father (OR 2.28 95% CI 1.19-4.39) (Figure 4).  
18  
19

### 20 **Analyses of representativeness**

21  
22  
23 The sex distribution did not differ between participants (n=2,185) and non-participants (n=634), male  
24  
25 sex: 51.5% vs. 54.6%, p=0.177. However, compared with the participants, the non-participants more  
26  
27 often had a smoking mother (16.2% vs. 26.7%, p<0.001), a smoking father (13.7% vs. 21.3%,  
28  
29 p<0.001), lived in a single-parent household (10.5% vs. 19.7%, p<0.001), and reported having  
30  
31 physician-diagnosed asthma (6.7% vs. 10.4%, p=0.004) at recruitment. Further, a comparison  
32  
33 between the n=2185 participants and the n=213 that participated at age 14-15y but not at age 19y  
34  
35 showed a similar pattern in the characteristics.  
36  
37  
38  
39  
40  
41  
42  
43

### 44 **Discussion**

45 In this population-based cohort study, daily smoking, use of snus and having a smoking father at age  
46  
47 14-15 years predicted e-cigarette use at age 19 years. Furthermore, e-cigarette use was more  
48  
49 common among boys and less common among teenagers who were physically active and ate a  
50  
51 healthy diet. Among never smokers and non-snus users at age 14-15 years, male sex and having a  
52  
53 smoking father predicted e-cigarette use at age 19 years. Importantly, almost one-third of those who  
54  
55 had tried e-cigarettes at age 19 years had never been smokers.  
56  
57  
58  
59  
60

1  
2  
3 Biologically, teenagers are particularly susceptible to nicotine addiction and it has been shown that  
4 occasional smoking at a young age is associated with greater likelihood of daily smoking and future  
5 nicotine dependence<sup>37,38</sup>. Even occasional smoking is sufficient to develop abstinence symptoms<sup>38</sup>  
6 and may increase the likelihood of trying new nicotine delivery products out of curiosity<sup>39,40</sup>. Thus, we  
7 were not surprised that smoking conventional cigarettes and using snus predicted e-cigarette use in  
8 our study. Although the prevalence of dual use was low in our study, other studies have shown that  
9 the use of multiple tobacco and nicotine products has become more common particularly among  
10 young adults<sup>41</sup>. The different properties and legislation of cigarettes, snus and e-cigarettes enable the  
11 user to choose product depending on the situation. We found that one-fifth of never smokers and  
12 never snus users, respectively, at age 14-15 years had tried e-cigarettes four years later. Moreover,  
13 almost one-third of e-cigarette users had never been a tobacco user, which is a cause for concern as  
14 it has been shown that e-cigarette use is a predictor of becoming a tobacco smoker<sup>17</sup>. Finally, the  
15 teenagers in this cohort did not seem to use e-cigarettes as a smoking cessation method, as only one  
16 former smoker was a current e-cigarette user. Thus, due to the appeal of e-cigarettes among never  
17 smokers, our findings further undermine the claim that e-cigarettes are a useful harm reduction  
18 product.

19  
20 One explanation for the strong appeal of e-cigarettes to non-smoking teenagers may be the plethora  
21 of flavors, including fruits, sweets and desserts<sup>42,43</sup>. In order to make e-cigarettes less appealing it has  
22 been suggested, for instance by the Food And Drug Administration (FDA) in the U.S. that flavors  
23 other than tobacco, mint and menthol should be banned<sup>44</sup>. The prominent taste of conventional  
24 cigarettes and most varieties of Swedish snus may avert teenagers from use. Consequently, e-  
25 cigarettes seem to appeal to new users that may not have initiated tobacco use otherwise,  
26 supporting the gateway theory<sup>19</sup>.

1  
2  
3 In line with other studies, we found that e-cigarette use was more common in boys than girls<sup>23,24,45</sup>.

4  
5 One explanation may be that teenaged boys have a more risk-taking behavior than girls and  
6  
7 therefore are willing to try a new nicotine delivery product. For a long time, tobacco smoking was  
8  
9 more common among men than women in Sweden, but during the 1990s and 2000s it was more  
10  
11 common among women<sup>46</sup>. It may be that e-cigarette use follows the same pattern as the traditional  
12  
13 tobacco epidemic, with a higher uptake among men in the beginning followed by an increase among  
14  
15 women. Among teenagers, social role modelling may contribute to the choice of tobacco product as  
16  
17 smoking is more common among mothers and daughters, while snus use is more common among  
18  
19 fathers and sons<sup>28,29</sup>. Unfortunately we did not ask for parental e-cigarette use, but we did find that  
20  
21 e-cigarette use was associated with having a smoking father and that it was more common the more  
22  
23 family members that smoked, suggesting that parental smoking habits play an important role for e-  
24  
25 cigarette uptake.  
26  
27  
28  
29  
30  
31  
32  
33

34 We did not find any associations with parental socio-economic status, but e-cigarette use was more  
35  
36 common among teenagers in vocational than preparatory upper secondary education. In Sweden,  
37  
38 the vocational programs mainly lead to jobs within the industry and service, while many attending  
39  
40 preparatory programs continue on to higher education. It is well known that smoking conventional  
41  
42 cigarettes is associated with lower educational level, while studies of e-cigarette use have shown  
43  
44 inconsistent results<sup>14,47</sup>. Nevertheless, our results indicate that the associations between lower  
45  
46 educational level and smoking conventional or electronic cigarettes seen among adults is present  
47  
48 already in early teenage in the choice of education. Moreover, e-cigarette use was less common  
49  
50 among the teenagers who were physically active and ate a healthy diet. Tobacco use, physical  
51  
52 inactivity and unhealthy diet as well as low educational level are known risk factors for public health  
53  
54 diseases, for instance cardiovascular disease, and regrettably, the same individuals often recur in all  
55  
56 of these high-risk groups<sup>48,49</sup>, in accordance with the common liability theory<sup>19,25</sup>. Another interesting  
57  
58  
59  
60

1  
2  
3 finding was that e-cigarette use was associated with poor HRQoL, particularly among the girls. An  
4  
5 association between HRQoL and tobacco smoking has been demonstrated among teenagers<sup>34</sup>. Thus,  
6  
7 the predictors for e-cigarette use were to a large extent the same as for conventional cigarettes,  
8  
9 which implies that the already available successful tobacco prevention measures only need minor  
10  
11 modifications to also include e-cigarette use. Supporting teenagers to choose a healthy lifestyle  
12  
13 without any tobacco or nicotine products is an important public health effort.  
14  
15  
16  
17  
18  
19

20 The strengths of the study include the prospective study design, with high initial participation rates  
21  
22 and few individuals lost to follow-up. Among those lost to follow-up, there was a higher proportion  
23  
24 of children having smoking parents than among those who participated in the survey at age 19 years.  
25  
26 As having smoking parents and initiation of tobacco use in teenage is strongly correlated, we may  
27  
28 have underestimated the prevalence of tobacco and e-cigarette use. On the other hand, most likely  
29  
30 we have not overestimated the significance of the associations<sup>50</sup>. Tobacco and e-cigarette use was  
31  
32 based on self-reports and not verified by objective measures such as level of cotinine. However, the  
33  
34 prevalence of smokers, snus and e-cigarette users were in line with the prevalence in corresponding  
35  
36 ages reported in Swedish national surveys<sup>4</sup>, supporting the external validity of our results. Questions  
37  
38 about diet and physical activity were included in the questionnaire at age 19y and thus represent  
39  
40 cross-sectional associations with e-cigarette use. Another limitation is that the main focus of this  
41  
42 cohort study is asthma and allergic diseases, and therefore we did not include questions about  
43  
44 personality traits related to tobacco or nicotine product initiation, sensation seeking behavior,  
45  
46 alcohol intake or other risk-taking behavior in the questionnaire.  
47  
48  
49  
50

51  
52 In conclusion, daily smoking, use of snus and having a smoking father at age 14-15 years predicted e-  
53  
54 cigarette use at age 19 years. Furthermore, e-cigarette use was associated with male sex, physical  
55  
56 inactivity, eating an unhealthy diet and attending vocational upper secondary education. Alarmingly,  
57  
58 almost one-third of those who had tried e-cigarettes at age 19 years had never been smokers or used  
59  
60

1  
2  
3 snus. Until the effects of e-cigarette use on respiratory and cardiovascular health have been fully  
4  
5 elucidated, the rapid increase of e-cigarette use among teenagers needs to be curbed. In order to  
6  
7 increase the efficacy of intervention efforts, the predictors and pattern of e-cigarette use among  
8  
9 teenagers need to be studied in detail and our study contribute new knowledge in the field.  
10  
11  
12

### 13 **Funding**

14  
15 This work was supported by The Swedish Heart-Lung Foundation [20140264; 20170438; 20170696;  
16  
17 20180214], ALF – a regional agreement between Umeå University and Västerbotten County Council  
18  
19 [RV-638731; RV-738451], the Swedish Asthma-Allergy Foundation [F2012-0036; F2012-0039], Visare  
20  
21 Norr fund: Northern County Council's Regional Federation [646191], and Norrbotten County Council  
22  
23 [867371; 933163] are acknowledged for financial support. None of the funders had any role in study  
24  
25 design, analysis or interpretation of data, or writing of the manuscript.  
26  
27  
28

### 29 **Acknowledgements**

30  
31 Sigrid Sundberg, Ann-Christin Jonsson, Chatrin Wahlgren and Zandra Lundgren are acknowledged for  
32  
33 data collection.  
34  
35

### 36 **Competing interests**

37  
38  
39 None declared  
40  
41

### 42 **Author contributions**

43  
44 LH participated in study design, data collection, performed the statistical analyses, drafted and  
45  
46 revised the manuscript and approved the final manuscript. HB, CS, ML and MA contributed to the  
47  
48 analyses and interpretation of data, revised the manuscript for important intellectual content and  
49  
50 approved the final manuscript. ER is responsible for study conception and study design, participated  
51  
52 in data collection, contributed to the analyses and interpretation of data, revised the manuscript for  
53  
54 important intellectual content and approved the final manuscript. All authors are accountable for all  
55  
56 aspects of the work.  
57  
58  
59  
60

### Data sharing statement

No additional data available.

## References

1. Hammond D, Reid JL, Rynard VL, et al. Prevalence of vaping and smoking among adolescents in Canada, England, and the United States: Repeat national cross sectional surveys. *BMJ*. 2019;365:l2219. doi: 10.1136/bmj.l2219.
2. Kapan A, Stefanac S, Sandner I, Haider S, Grabovac I, Dorner TE. Use of electronic cigarettes in European populations: A narrative review. *Int J Environ Res Public Health*. 2020;17:1971. doi: 10.3390/ijerph17061971.
3. Bals R, Boyd J, Esposito S, et al. Electronic cigarettes: A task force report from the European Respiratory Society. *Eur Respir J*. 2019;53(2). doi: 10.1183/13993003.01151-2018.
4. The Swedish Council for Information on Alcohol and other drugs, (CAN). Skolelevers drogvanor 2019 (alcohol and drug use among students). Report number 187. 2019.
5. Ying Xu, Yanfang Guo, Kaiqian Liu, Zheng Liu, Xiaobo Wang. E-cigarette awareness, use, and harm perception among adults: A meta-analysis of observational studies. *PLoS One*. 2016;11(11):e0165938. doi: 10.1371/journal.pone.0165938.
6. Glasser AM, Collins L, Pearson JL, et al. Overview of electronic nicotine delivery systems: A systematic review. *Am J Prev Med*. 2017;52(2):e33-e66. doi: S0749-3797(16)30573-6 [pii].
7. Kalkhoran S, Alvarado N, Vijayaraghavan M, Lum PJ, Yuan P, Satterfield JM. Patterns of and reasons for electronic cigarette use in primary care patients. *J Gen Intern Med*. 2017;32(10):1122-1129. doi: 10.1007/s11606-017-4123-x.



- 1  
2  
3 8. Goniewicz ML, Knysak J, Gawron M, et al. Levels of selected carcinogens and toxicants in vapour  
4 from electronic cigarettes. *Tob Control*. 2014;23(2):133-139. doi: 10.1136/tobaccocontrol-2012-  
5  
6 from electronic cigarettes. *Tob Control*. 2014;23(2):133-139. doi: 10.1136/tobaccocontrol-2012-  
7  
8 050859.  
9  
10  
11 9. Williams M, Villarreal A, Bozhilov K, Lin S, Talbot P. Metal and silicate particles including  
12 nanoparticles are present in electronic cigarette cartomizer fluid and aerosol. *PLoS ONE*.  
13  
14 2013;8(3):e57987. doi: 10.1371/journal.pone.0057987.  
15  
16  
17  
18 10. DeVito EE, Krishnan-Sarin S. E-cigarettes: Impact of E-liquid components and device  
19 characteristics on nicotine exposure. *Curr Neuropharmacol*. 2018;16(4):438-459. doi:  
20  
21 10.2174/1570159X15666171016164430.  
22  
23  
24  
25  
26 11. Ren M, Lotfipour S. Nicotine gateway effects on adolescent substance use. *The Western Journal*  
27  
28 *of Emergency Medicine*. 2019;20(5):696-709. doi: 10.5811/westjem.2019.7.41661.  
29  
30  
31  
32 12. de Lacy E, Fletcher A, Hewitt G, Murphy S, Moore G. Cross-sectional study examining the  
33 prevalence, correlates and sequencing of electronic cigarette and tobacco use among 11-16-year olds  
34 in schools in Wales. *BMJ Open*. 2017;7(2):e012784-012784. doi: 10.1136/bmjopen-2016-012784  
35  
36 [doi].  
37  
38  
39  
40  
41  
42 13. Tavalacci MP, Vasiliu A, Romo L, Kotbagi G, Kern L, Ladner J. Patterns of electronic cigarette use in  
43 current and ever users among college students in France: A cross-sectional study. *BMJ Open*.  
44  
45 2016;6(5):e011344-011344. doi: 10.1136/bmjopen-2016-011344 [doi].  
46  
47  
48  
49  
50 14. Hedman L, Backman H, Stridsman C, et al. Association of electronic cigarette use with smoking  
51 habits, demographic factors, and respiratory symptoms. *JAMA Network Open*. 2018;1(3):e180789.  
52  
53  
54  
55  
56  
57  
58  
59  
60

- 1  
2  
3 15. Vardavas CI, Filippidis FT, Agaku IT. Determinants and prevalence of e-cigarette use throughout  
4 the European Union: A secondary analysis of 26 566 youth and adults from 27 countries. *Tob Control*.  
5 2015;24(5):442-448.  
6  
7  
8  
9  
10  
11 16. Li J, Newcombe R, Walton D. The prevalence, correlates and reasons for using electronic  
12 cigarettes among New Zealand adults. *Addict Behav*. 2015;45:245-251. doi:  
13 10.1016/j.addbeh.2015.02.006.  
14  
15  
16  
17  
18 17. Soneji S, Barrington-Trimis JL, Wills TA, et al. Association between initial use of e-cigarettes and  
19 subsequent cigarette smoking among adolescents and young adults: A systematic review and meta-  
20 analysis. *JAMA Pediatr*. 2017;171(8):788-797. doi: 10.1001/jamapediatrics.2017.1488 [doi].  
21  
22  
23  
24  
25  
26 18. Barrington-Trimis JL, Urman R, Leventhal AM, et al. E-cigarettes, cigarettes, and the prevalence of  
27 adolescent tobacco use. *Pediatrics*. 2016;138(2):10.1542/peds.2015-3983. Epub 2016 Jul 11. doi:  
28 10.1542/peds.2015-3983 [doi].  
29  
30  
31  
32  
33  
34 19. Etter JF. Gateway effects and electronic cigarettes. *Addiction*. 2018;113(10):1776-1783. doi:  
35 10.1111/add.13924 [doi].  
36  
37  
38  
39  
40 20. Barrington-Trimis JL, Berhane K, Unger JB, et al. Psychosocial factors associated with adolescent  
41 electronic cigarette and cigarette use. *Pediatrics*. 2015;136(2):308-317. doi: 10.1542/peds.2015-0639  
42 [doi].  
43  
44  
45  
46  
47  
48 21. Vogel EA, Ramo DE, Rubinstein ML. Prevalence and correlates of adolescents' e-cigarette use  
49 frequency and dependence. *Drug Alcohol Depend*. 2018;188:109-112. doi: S0376-8716(18)30263-1  
50 [pii].  
51  
52  
53  
54  
55  
56  
57  
58  
59  
60

- 1  
2  
3 22. Cardenas VM, Breen PJ, Compadre CM, et al. The smoking habits of the family influence the  
4 uptake of e-cigarettes in US children. *Ann Epidemiol*. 2015;25(1):60-62. doi:  
5  
6 10.1016/j.annepidem.2014.09.013 [doi].  
7  
8  
9  
10  
11 23. Kinnunen JM, Ollila H, Minkkinen J, Lindfors PL, Rimpela AH. A longitudinal study of predictors for  
12 adolescent electronic cigarette experimentation and comparison with conventional smoking. *Int J*  
13 *Environ Res Public Health*. 2018;15(2):10.3390/ijerph15020305. doi: E305 [pii].  
14  
15  
16  
17  
18  
19 24. Babineau K, Taylor K, Clancy L. Electronic cigarette use among irish youth: A cross sectional study  
20 of prevalence and associated factors. *PLoS One*. 2015;10(5):e0126419. doi:  
21  
22 10.1371/journal.pone.0126419 [doi].  
23  
24  
25  
26  
27 25. Vanyukov MM, Tarter RE, Kirillova GP, et al. Common liability to addiction and "gateway  
28 hypothesis": Theoretical, empirical and evolutionary perspective. *Drug Alcohol Depend*. 2012;123  
29 Suppl 1:3. doi: 10.1016/j.drugalcdep.2011.12.018 [doi].  
30  
31  
32  
33  
34  
35 26. Kim S, Selya AS. The relationship between electronic cigarette use and conventional cigarette  
36 smoking is largely attributable to shared risk factors. *Nicotine Tob Res*. 2020;22:1123-1130. doi:  
37  
38 10.1093/ntr/ntz157  
39  
40  
41  
42  
43 27. Leon ME, Lugo A, Boffetta P, Gilmore A, Ross H, Schüz J, La Vecchia C, Gallus S. Smokeless tobacco  
44 use in Sweden and other 17 European countries. *Eur J Public Health* 2016;26:817-821. doi:  
45  
46 10.1093/eurpub/ckw032.  
47  
48  
49  
50  
51 28. Rosendahl KI, Galanti MR, Ahlbom A. Smoking mothers and snuffing fathers: Behavioural  
52 influences on youth tobacco use in a Swedish cohort. *Tobacco Control*. 2003;12:74-78. doi:  
53  
54 10.1136/tc.12.1.74.  
55  
56  
57  
58  
59  
60

- 1  
2  
3 29. Hedman L, Bjerg A, Perzanowski M, Sundberg S, Rönmark E. Factors related to tobacco use  
4 among teenagers. *Respir Med*. 2007;101(3):496-502. doi: 10.1016/j.rmed.2006.07.001.  
5  
6  
7  
8  
9 30. Rönmark E, Bjerg A, Perzanowski M, Platts-Mills T, Lundbäck B. Major increase in allergic  
10 sensitization in schoolchildren from 1996 to 2006 in northern Sweden. *J Allergy Clin Immunol*.  
11 2009;124:357-363. doi: 10.1016/j.jaci.2009.05.011.  
12  
13  
14  
15  
16 31. Bjerg A, Sandström T, Lundbäck B, Rönmark E. Time trends in asthma and wheeze in Swedish  
17 children 1996-2006: Prevalence and risk factors by sex. *Allergy*. 2010;65(1):48-55. doi:  
18 10.1111/j.1398-9995.2009.02105.x.  
19  
20  
21  
22  
23  
24 32. Bunne J, Moberg H, Hedman L, et al. Increase in allergic sensitization in schoolchildren: Two  
25 cohorts compared 10 years apart. *J Allergy Clin Immunol Pract*. 2017;5(2):457-463.e1. doi: S2213-  
26 2198(16)30426-3 [pii].  
27  
28  
29  
30  
31  
32 33. Asher MI, Keil U, Anderson HR, et al. International study of asthma and allergies in childhood  
33 (ISAAC): Rationale and methods. *Eur Respir J*. 1995;8(3):483-91. doi:  
34 10.1183/09031936.95.08030483.  
35  
36  
37  
38  
39  
40 34. Hedman L, Andersson M, Stridsman C, Rönmark E. Evaluation of a tobacco prevention  
41 programme among teenagers in Sweden. *BMJ Open*. 2015;5(5):e007673-007673. doi:  
42 10.1136/bmjopen-2015-007673.  
43  
44  
45  
46  
47  
48 35. Ravens-Sieberer U, Erhart M, Rajmil L, et al. Reliability, construct and criterion validity of the  
49 KIDSCREEN-10 score: A short measure for children and adolescents' well-being and health-related  
50 quality of life. *Qual Life Res*. 2010;19(10):1487-1500. doi: 10.1007/s11136-010-9706-5.  
51  
52  
53  
54  
55  
56 36. Statistics Sweden. Socio-economic classification. MIS 1982:4.  
57  
58  
59  
60

- 1  
2  
3 37. Kendler KS, Myers J, Damaj MI, Chen X. Early smoking onset and risk for subsequent nicotine  
4 dependence: A monozygotic co-twin control study. *Am J Psychiatry*. 2013;170(4):408-413. doi:  
5  
6 10.1176/appi.ajp.2012.12030321 [doi].  
7  
8  
9  
10  
11 38. Siqueira LM, COMMITTEE ON SUBSTANCE USE AND PREVENTION. Nicotine and tobacco as  
12 substances of abuse in children and adolescents. *Pediatrics*. 2017;139(1):10.1542/peds.2016-3436.  
13 doi: e20163436 [pii].  
14  
15  
16  
17  
18 39. Margolis KA, Nguyen AB, Slavik WI, King BA. E-cigarette curiosity among U.S. middle and high  
19 school students: Findings from the 2014 national youth tobacco survey. *Prev Med*. 2016;89:1-6. doi:  
20  
21 10.1016/j.ypmed.2016.05.001.  
22  
23  
24  
25  
26 40. Kinnunen JM, Ollila H, Lindfors PL, Rimpelä AH. Changes in electronic cigarette use from 2013 to  
27 2015 and reasons for use among Finnish adolescents. *Int J Environ Res Public Health*. 2016;13(11).  
28 Accessed Jun 5, 2019. doi: 10.3390/ijerph13111114.  
29  
30  
31  
32  
33  
34 41. Osibogun O, Taleb ZB, Bahelah R, Salloum RG, Maziak W. Correlates of poly-tobacco use among  
35 youth and young adults: Findings from the population assessment of tobacco and health study, 2013-  
36 2014. *Drug Alcohol Depend*. 2018;187:160-164. doi: S0376-8716(18)30187-X [pii].  
37  
38  
39  
40  
41  
42 42. Patel D, Davis KC, Cox S, et al. Reasons for current E-cigarette use among U.S. adults. *Prev Med*.  
43 2016;93:14-20. doi: S0091-7435(16)30268-7 [pii].  
44  
45  
46  
47  
48 43. Publications Office of the European Union. Attitudes of Europeans towards tobacco and  
49 electronic cigarettes: Report; special Eurobarometer 458. 2018:1-205.  
50  
51 [https://publications.europa.eu/en/publication-detail/-/publication/2f01a3d1-0af2-11e8-966a-](https://publications.europa.eu/en/publication-detail/-/publication/2f01a3d1-0af2-11e8-966a-01aa75ed71a1/language-en/format-PDF)  
52  
53 [01aa75ed71a1/language-en/format-PDF](https://publications.europa.eu/en/publication-detail/-/publication/2f01a3d1-0af2-11e8-966a-01aa75ed71a1/language-en/format-PDF) . Accessed May 28, 2019.  
54  
55  
56  
57  
58  
59  
60

- 1  
2  
3 44. Drazen JM, Morrissey S, Campion EW. The dangerous flavors of E-cigarettes. *The New England*  
4  
5 *Journal of Medicine*. 2019;380(7):679-680. doi: 10.1056/NEJMe1900484.  
6  
7  
8  
9 45. Farsalinos KE, Poulas K, Voudris V, Le Houezec J. Prevalence and correlates of current daily use of  
10  
11 electronic cigarettes in the European Union: Analysis of the 2014 Eurobarometer survey. *Intern*  
12  
13 *Emerg Med*. 2017;12(6):757-763. Accessed Oct 10, 2017. doi: 10.1007/s11739-017-1643-7.  
14  
15  
16  
17 46. Backman H, Raisanen P, Hedman L, et al. Increased prevalence of allergic asthma from 1996 to  
18  
19 2006 and further to 2016—results from three population surveys. *Clin Exp Allergy*. 2017;47(11):1426-  
20  
21 1435. doi: 10.1111/cea.12963 [doi].  
22  
23  
24  
25 47. Hartwell G, Thomas S, Egan M, Gilmore A, Petticrew M. E-cigarettes and equity: A systematic  
26  
27 review of differences in awareness and use between sociodemographic groups. *Tobacco Control*.  
28  
29 2017;26(e2):e85-e91. doi: 10.1136/tobaccocontrol-2016-053222.  
30  
31  
32  
33 48. Reas DL, Wisting L, Stedal K, Dahlgren CL. Unhealthy eating and weight dissatisfaction in  
34  
35 adolescents who never, occasionally, or regularly use smokeless tobacco (Swedish snus). *Int J Eat*  
36  
37 *Disord*. 2019;52(7):846-854. doi: 10.1002/eat.23085.  
38  
39  
40  
41 49. Manuel DG, Perez R, Sanmartin C, et al. Measuring burden of unhealthy behaviours using a  
42  
43 multivariable predictive approach: Life expectancy lost in Canada attributable to smoking, alcohol,  
44  
45 physical inactivity, and diet. *PLOS Medicine*. 2016;13(8):e1002082. doi:  
46  
47 10.1371/journal.pmed.1002082.  
48  
49  
50  
51 50. Rönmark EP, Ekerljung L, Lötvall J, Torén K, Rönmark E, Lundbäck B. Large scale questionnaire  
52  
53 survey on respiratory health in sweden: Effects of late- and non-response. *Respir Med*.  
54  
55 2009;103:1807-1815.  
56  
57

## 58 **Legends to figures**

59  
60

1  
2  
3 Figure 1. Smoking habits among e-cigarette users. The bars represent all those who had ever tried e-  
4 cigarettes and all current e-cigarette users at age 19 years, respectively.  
5

6 Never smoker: never smoker at age 14-15 and 19y; Ever occasional smoker: occasional smoker at age  
7 14-15 or 19y but not a daily smoker; Former smoker: either self-reported former smoker at age 19y  
8 or being a non-smoker or occasional smoker at 14-15y and non-smoker at 19y; Ever daily smoker:  
9 daily smoker at 14-15 or 19y.  
10  
11  
12  
13

14 Figure 2. The prevalence of ever and current e-cigarette use and current tobacco smoking at age 19  
15 years in relation to number of smoking family members at age 14-15 years.  
16  
17  
18  
19

20 Figure 3. Risk factors for current e-cigarette use at age 19 years, analysed in an adjusted logistic  
21 regression analysis (including all factors listed in the figure) with the result expressed as odds ratios  
22 with 95% confidence intervals.  
23  
24

25 \*Entered as a continuous variable (score 0-4)  
26

27 \*\*Upper secondary education, reference category: preparatory education  
28

29 HRQoL: health-related quality of life  
30  
31  
32

33 Figure 4. Risk factors for current e-cigarette use at age 19 years among the teenagers who were  
34 never-smokers and did not use snus at age 14-15 years, analysed in an adjusted logistic regression  
35 analysis (including all factors listed in the figure) with the results expressed as odds ratios with 95%  
36 confidence intervals.  
37  
38

39 \* Entered as a continuous variable (score 0-4)  
40

41 \*\*Upper secondary education, reference category: preparatory education  
42  
43  
44  
45  
46  
47  
48  
49  
50  
51  
52  
53  
54  
55  
56  
57  
58  
59  
60

Table 1. The prevalence of smoking and use of snus at age 14-15 years and 19 years, and e-cigarette use at age 19 years\*.

|                                            | Girls     |      | Boys      |      | Difference<br>by sex,<br>p-value | All       |      |
|--------------------------------------------|-----------|------|-----------|------|----------------------------------|-----------|------|
|                                            | n         | %    | n         | %    |                                  | n         | %    |
| <i>Parental smoking at age 14-15 years</i> |           |      |           |      |                                  |           |      |
| Father smoker                              | 129/1034  | 12.5 | 127/1093  | 11.6 | 0.544                            | 256/2127  | 12.0 |
| Mother smoker                              | 115/1036  | 11.1 | 146/1092  | 13.4 | 0.111                            | 261/2128  | 12.3 |
| <i>Tobacco use at age 14-15 years</i>      |           |      |           |      |                                  |           |      |
| Never smoker                               | 932/1053  | 88.5 | 1012/1108 | 91.3 |                                  | 1944/2161 | 90.0 |
| Occasional smoker                          | 81/1053   | 7.7  | 67/1108   | 6.0  |                                  | 148/2161  | 6.8  |
| Daily smoker                               | 40/1053   | 3.8  | 29/1108   | 2.6  | 0.083                            | 69/2161   | 3.2  |
| Never snus user                            | 1036/1055 | 98.2 | 1034/1109 | 93.2 |                                  | 2070/2164 | 95.7 |
| Occasional snus user                       | 11/1055   | 1.0  | 19/1109   | 1.7  |                                  | 30/2164   | 1.4  |
| Daily snus user                            | 8/1055    | 0.8  | 56/1109   | 5.0  | <0.001                           | 64/2164   | 3.0  |
| <i>Tobacco use at age 19 years</i>         |           |      |           |      |                                  |           |      |
| Never smoker                               | 666/1044  | 63.8 | 662/1105  | 59.9 |                                  | 1328/2149 | 61.8 |
| Former smoker                              | 14/1044   | 1.3  | 15/1105   | 1.4  |                                  | 29/2149   | 1.3  |
| Occasional smoker                          | 267/1044  | 25.6 | 346/1105  | 31.3 |                                  | 613/2149  | 28.5 |
| Daily smoker                               | 97/1044   | 9.3  | 82/1105   | 7.4  | 0.021                            | 179/2149  | 8.3  |
| Daily snus user                            | 65/1052   | 6.2  | 247/1111  | 22.2 | <0.001                           | 312/2163  | 14.4 |
| <i>E-cigarette use at age 19 years</i>     |           |      |           |      |                                  |           |      |
| Ever tried/used e-cigarettes               | 158/1049  | 15.1 | 302/1096  | 27.6 | <0.001                           | 460/2145  | 21.4 |
| Current e-cigarette user                   | 36/1049   | 3.4  | 54/1096   | 4.9  | 0.084                            | 90/2145   | 4.2  |

\*Individuals with missing answers in the individual questions about tobacco use and e-cigarette use were excluded from the analysis.



Table 2. E-cigarette use at the age of 19 years in relation to smoking, use of snus and parental tobacco use at age 14-15 years\*.

|                                            | Ever tried/used e-cigarettes |          |         | Current e-cigarette use |      |         |
|--------------------------------------------|------------------------------|----------|---------|-------------------------|------|---------|
|                                            | n                            | %        | p-value | n                       | %    | p-value |
| <i>Smoking at age 14-15 years</i>          |                              |          |         |                         |      |         |
| Never                                      | 364/1910                     | 19.1     |         | 61/1910                 | 3.2  |         |
| Occasionally                               | 50/147                       | 34.0     |         | 11/147                  | 7.5  |         |
| Daily                                      | 39/64                        | 60.9     | <0.001  | 18/64                   | 28.1 | <0.001  |
| <i>Use of snus at age 14-15 years</i>      |                              |          |         |                         |      |         |
| Never                                      | 405/2035                     | 19.9     |         | 76/2035                 | 3.7  |         |
| Occasionally                               | 16/28                        | 57.1     |         | 5/28                    | 17.9 |         |
| Daily                                      | 31/61                        | 50.8     | <0.001  | 9/61                    | 14.8 | <0.001  |
| <i>Parental smoking at age 14-15 years</i> |                              |          |         |                         |      |         |
| Father smoker                              | No                           | 374/1835 | 20.4    | 69/1835                 | 3.8  |         |
|                                            | Yes                          | 72/253   | 28.5    | 20/253                  | 7.9  | 0.002   |
| Mother smoker                              | No                           | 368/1832 | 20.1    | 73/1832                 | 4.0  |         |
|                                            | Yes                          | 76/256   | 29.7    | 16/256                  | 6.3  | 0.093   |

\*Individuals with missing answers in the individual questions about tobacco use and e-cigarette use were excluded from the analysis.

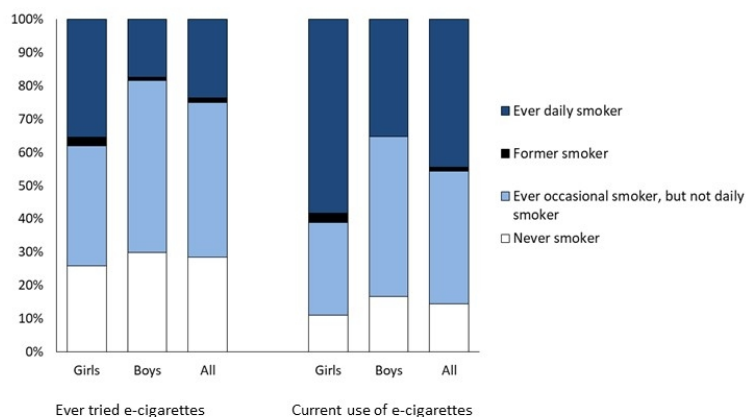

Figure 1. Smoking habits among e-cigarette users. The bars represent all those who had ever tried e-cigarettes and all current e-cigarette users at age 19 years, respectively.

Never smoker: never smoker at age 14-15 and 19y; Ever occasional smoker: occasional smoker at age 14-15 or 19y but not a daily smoker; Former smoker: either self-reported former smoker at age 19y or being a non-smoker or occasional smoker at 14-15y and non-smoker at 19y; Ever daily smoker: daily smoker at 14-15 or 19y.

Figure 1. Smoking habits among e-cigarette users. The bars represent all those who had ever tried e-cigarettes and all current e-cigarette users at age 19 years, respectively. Never smoker: never smoker at age 14-15 and 19y; Ever occasional smoker: occasional smoker at age 14-15 or 19y but not a daily smoker; Former smoker: either self-reported former smoker at age 19y or being a non-smoker or occasional smoker at 14-15y and non-smoker at 19y; Ever daily smoker: daily smoker at 14-15 or 19y.

81x60mm (300 x 300 DPI)

1  
2  
3  
4  
5  
6  
7  
8  
9  
10  
11  
12  
13  
14  
15  
16  
17  
18  
19  
20  
21  
22  
23  
24  
25  
26  
27  
28  
29  
30  
31  
32  
33  
34  
35  
36  
37  
38  
39  
40  
41  
42  
43  
44  
45  
46  
47  
48  
49  
50  
51  
52  
53  
54  
55  
56  
57  
58  
59  
60

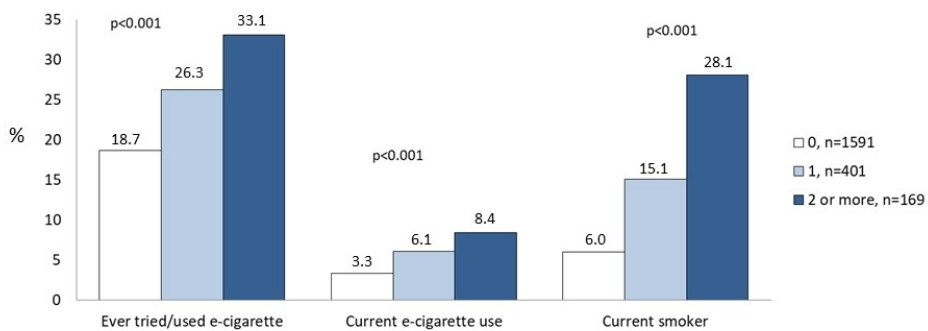

Figure 2. The prevalence of ever and current e-cigarette use and current tobacco smoking at age 19 years in relation to number of smoking family members at age 14-15 years.

Figure 2. The prevalence of ever and current e-cigarette use and current tobacco smoking at age 19 years in relation to number of smoking family members at age 14-15 years.

81x60mm (300 x 300 DPI)

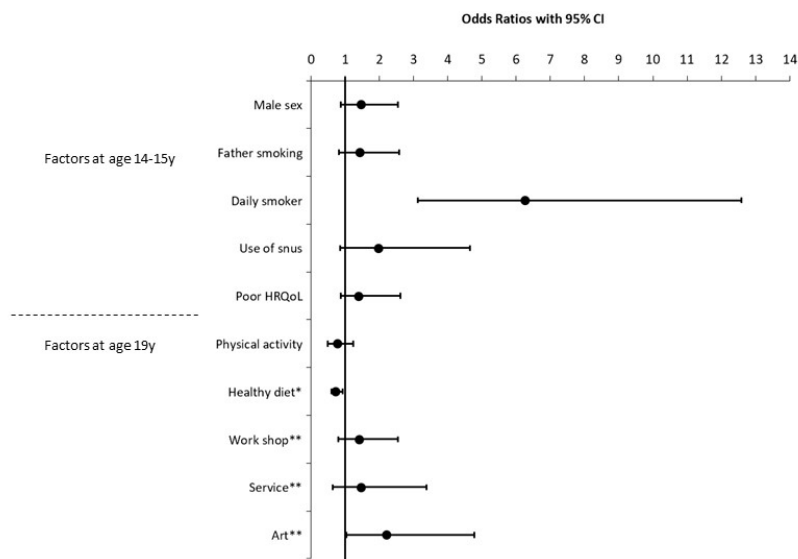

Figure 3. Risk factors for current e-cigarette use at age 19 years, analysed in an adjusted logistic regression analysis (including all factors listed in the figure) with the result expressed as odds ratios with 95% confidence intervals.

\*Entered as a continuous variable (score 0-4)  
 \*\*Upper secondary education, reference category: preparatory education  
 HRQoL: health-related quality of life

Figure 3. Risk factors for current e-cigarette use at age 19 years, analysed in an adjusted logistic regression analysis (including all factors listed in the figure) with the result expressed as odds ratios with 95% confidence intervals. \*Entered as a continuous variable (score 0-4). \*\*Upper secondary education, reference category: preparatory education. HRQoL: health-related quality of life

81x60mm (300 x 300 DPI)

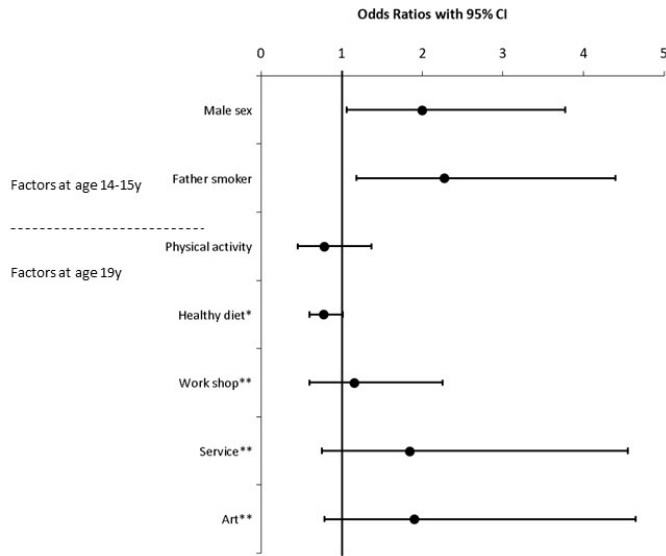

Figure 4. Risk factors for current e-cigarette use at age 19 years among the teenagers who were never-smokers and did not use snus at age 14-15 years, analysed in an adjusted logistic regression analysis (including all factors listed in the figure) with the results expressed as odds ratios with 95% confidence intervals.  
 \* Entered as a continuous variable (score 0-4)  
 \*\*Upper secondary education, reference category: preparatory education

Figure 4. Risk factors for current e-cigarette use at age 19 years among the teenagers who were never-smokers and did not use snus at age 14-15 years, analysed in an adjusted logistic regression analysis (including all factors listed in the figure) with the results expressed as odds ratios with 95% confidence intervals. \* Entered as a continuous variable (score 0-4). \*\*Upper secondary education, reference category: preparatory education

81x60mm (300 x 300 DPI)

## Online supplement

Table E1. Factors associated with current e-cigarette use at age 19 years, analysed in unadjusted logistic regression analyses with the results expressed as odds ratios with 95% confidence intervals.

|                                   |                                   | OR            | 95% CI       |
|-----------------------------------|-----------------------------------|---------------|--------------|
| Sex                               | Female                            | 1.00          |              |
|                                   | Male                              | 1.46          | (0.95-2.24)  |
| Upper secondary school education  | Preparatory                       | 1.00          |              |
|                                   | Work shop                         | 2.68          | (1.59-4.49)  |
|                                   | Service                           | 2.15          | (1.01-4.54)  |
|                                   | Art                               | 2.22          | (1.07-4.58)  |
| <i>Factors at age 14-15 years</i> |                                   |               |              |
| Father smoker                     | No                                | 1.00          |              |
|                                   | Yes                               | 2.20          | (1.31-3.68)  |
| Mother smoker                     | No                                | 1.00          |              |
|                                   | Yes                               | 1.61          | (0.82-2.81)  |
| Personal smoking habits           | Never                             | 1.00          |              |
|                                   | Occasionally                      | 2.45          | (1.26-4.77)  |
|                                   | Daily                             | 11.86         | (6.50-21.65) |
| Use of snus                       | Never                             | 1.00          |              |
|                                   | Occasionally                      | 5.60          | (2.07-15.14) |
|                                   | Daily                             | 4.46          | (2.12-9.39)  |
| Parental socioeconomic status     | Professionals and executives      | 1.00          |              |
|                                   | Self-employed                     | 1.03          | (0.34-3.15)  |
|                                   | Intermediate non manual employees | 1.18          | (0.62-2.24)  |
|                                   | Assistant non-manual employees    | 1.07          | (0.47-2.47)  |
|                                   | Manual workers in industry        | 1.78          | (0.87-3.61)  |
|                                   | Manual workers in service         | 1.91          | (0.92-3.98)  |
|                                   | Unemployed                        | Too few cases |              |
| Single parent household           | No                                | 1.00          |              |
|                                   | Yes                               | 1.14          | (0.58-2.25)  |
| Current asthma at age 14-15 years | No                                | 1.00          |              |
|                                   | Yes                               | 0.87          | (0.43-1.76)  |
| <i>Factors at age 19 years</i>    |                                   |               |              |
| Physical activity                 | No                                | 1.00          |              |
|                                   | Yes                               | 0.56          | (0.37-0.86)  |
| Healthy diet                      | Entered as a continuous variable  | 0.64          | (0.53-0.78)  |

**STROBE 2007 (v4) Statement—Checklist of items that should be included in reports of *cohort studies***

| Section/Topic                | Item # | Recommendation                                                                                                                                                                       | Reported on page #                         |
|------------------------------|--------|--------------------------------------------------------------------------------------------------------------------------------------------------------------------------------------|--------------------------------------------|
| <b>Title and abstract</b>    | 1      | (a) Indicate the study's design with a commonly used term in the title or the abstract                                                                                               | 1 and 2                                    |
|                              |        | (b) Provide in the abstract an informative and balanced summary of what was done and what was found                                                                                  | 2                                          |
| <b>Introduction</b>          |        |                                                                                                                                                                                      |                                            |
| Background/rationale         | 2      | Explain the scientific background and rationale for the investigation being reported                                                                                                 | 3-4                                        |
| Objectives                   | 3      | State specific objectives, including any prespecified hypotheses                                                                                                                     | 4                                          |
| <b>Methods</b>               |        |                                                                                                                                                                                      |                                            |
| Study design                 | 4      | Present key elements of study design early in the paper                                                                                                                              | 4; Study sample                            |
| Setting                      | 5      | Describe the setting, locations, and relevant dates, including periods of recruitment, exposure, follow-up, and data collection                                                      | 4; Study sample                            |
| Participants                 | 6      | (a) Give the eligibility criteria, and the sources and methods of selection of participants. Describe methods of follow-up                                                           | 4; Study sample                            |
|                              |        | (b) For matched studies, give matching criteria and number of exposed and unexposed                                                                                                  | NA                                         |
| Variables                    | 7      | Clearly define all outcomes, exposures, predictors, potential confounders, and effect modifiers. Give diagnostic criteria, if applicable                                             | 4; Questionnaire<br>5; Definitions         |
| Data sources/<br>measurement | 8*     | For each variable of interest, give sources of data and details of methods of assessment (measurement). Describe comparability of assessment methods if there is more than one group | 4; Questionnaire<br>5; Definitions         |
| Bias                         | 9      | Describe any efforts to address potential sources of bias                                                                                                                            | 6; Statistical analyses                    |
| Study size                   | 10     | Explain how the study size was arrived at                                                                                                                                            | 4; Study sample<br>6; Statistical analyses |
| Quantitative variables       | 11     | Explain how quantitative variables were handled in the analyses. If applicable, describe which groupings were chosen and why                                                         | 6; Statistical analyses                    |
| Statistical methods          | 12     | (a) Describe all statistical methods, including those used to control for confounding                                                                                                | 6; Statistical analyses                    |
|                              |        | (b) Describe any methods used to examine subgroups and interactions                                                                                                                  | 6; Statistical analyses                    |
|                              |        | (c) Explain how missing data were addressed                                                                                                                                          | 6; Statistical analyses                    |
|                              |        | (d) If applicable, explain how loss to follow-up was addressed                                                                                                                       | 6; Statistical analyses                    |
|                              |        | (e) Describe any sensitivity analyses                                                                                                                                                | NA                                         |

| <b>Results</b>           |     |                                                                                                                                                                                                              |                                                                                   |
|--------------------------|-----|--------------------------------------------------------------------------------------------------------------------------------------------------------------------------------------------------------------|-----------------------------------------------------------------------------------|
| Participants             | 13* | (a) Report numbers of individuals at each stage of study—eg numbers potentially eligible, examined for eligibility, confirmed eligible, included in the study, completing follow-up, and analysed            | 4; Study sample<br>6; Statistical analyses<br>7-8; Analyses of representativeness |
|                          |     | (b) Give reasons for non-participation at each stage                                                                                                                                                         | 7-8; Analyses of representativeness                                               |
|                          |     | (c) Consider use of a flow diagram                                                                                                                                                                           | NA                                                                                |
| Descriptive data         | 14* | (a) Give characteristics of study participants (eg demographic, clinical, social) and information on exposures and potential confounders                                                                     | Table 1<br>6: The prevalence of tobacco use at ages 14-15 and 19 years            |
|                          |     | (b) Indicate number of participants with missing data for each variable of interest                                                                                                                          | Table 1<br>Table 2                                                                |
|                          |     | (c) Summarise follow-up time (eg, average and total amount)                                                                                                                                                  | 4; Study sample                                                                   |
| Outcome data             | 15* | Report numbers of outcome events or summary measures over time                                                                                                                                               | Table 1                                                                           |
| Main results             | 16  | (a) Give unadjusted estimates and, if applicable, confounder-adjusted estimates and their precision (eg, 95% confidence interval). Make clear which confounders were adjusted for and why they were included | Table 2<br>Figure 3<br>Figure 4                                                   |
|                          |     | (b) Report category boundaries when continuous variables were categorized                                                                                                                                    | NA                                                                                |
|                          |     | (c) If relevant, consider translating estimates of relative risk into absolute risk for a meaningful time period                                                                                             | NA                                                                                |
| Other analyses           | 17  | Report other analyses done—eg analyses of subgroups and interactions, and sensitivity analyses                                                                                                               | Figure 4                                                                          |
| <b>Discussion</b>        |     |                                                                                                                                                                                                              |                                                                                   |
| Key results              | 18  | Summarise key results with reference to study objectives                                                                                                                                                     | 10; Discussion                                                                    |
| <b>Limitations</b>       |     |                                                                                                                                                                                                              |                                                                                   |
| Interpretation           | 20  | Give a cautious overall interpretation of results considering objectives, limitations, multiplicity of analyses, results from similar studies, and other relevant evidence                                   | 10-12                                                                             |
| Generalisability         | 21  | Discuss the generalisability (external validity) of the study results                                                                                                                                        | 12                                                                                |
| <b>Other information</b> |     |                                                                                                                                                                                                              |                                                                                   |



|         |    |                                                                                                                                                               |             |
|---------|----|---------------------------------------------------------------------------------------------------------------------------------------------------------------|-------------|
| Funding | 22 | Give the source of funding and the role of the funders for the present study and, if applicable, for the original study on which the present article is based | 13; Funding |
|---------|----|---------------------------------------------------------------------------------------------------------------------------------------------------------------|-------------|

\*Give information separately for cases and controls in case-control studies and, if applicable, for exposed and unexposed groups in cohort and cross-sectional studies.

**Note:** An Explanation and Elaboration article discusses each checklist item and gives methodological background and published examples of transparent reporting. The STROBE checklist is best used in conjunction with this article (freely available on the Web sites of PLoS Medicine at <http://www.plosmedicine.org/>, Annals of Internal Medicine at <http://www.annals.org/>, and Epidemiology at <http://www.epidem.com/>). Information on the STROBE Initiative is available at [www.strobe-statement.org](http://www.strobe-statement.org).

For peer review only
