# Supplementary material for: Predictors of electronic cigarette use among Swedish teenagers: a population-based cohort study
Source: HighWire-hosted journal article supplement (doi:10.1136/bmjopen-2020-040683), 2020-12-01
Supplement: bmjopen-2020-040683supp001_data_supplement.pdf [file bmjopen-2020-040683supp001_data_supplement.pdf]

## Online supplement

Table E1. Factors associated with current e-cigarette use at age 19 years, analysed in unadjusted logistic regression analyses with the results expressed as odds ratios with 95% confidence intervals.

|                                   |                                   | OR            | 95% CI       |
|-----------------------------------|-----------------------------------|---------------|--------------|
| Sex                               | Female                            | 1.00          |              |
|                                   | Male                              | 1.46          | (0.95-2.24)  |
| Upper secondary school education  | Preparatory                       | 1.00          |              |
|                                   | Work shop                         | 2.68          | (1.59-4.49)  |
|                                   | Service                           | 2.15          | (1.01-4.54)  |
|                                   | Art                               | 2.22          | (1.07-4.58)  |
| <i>Factors at age 14-15 years</i> |                                   |               |              |
| Father smoker                     | No                                | 1.00          |              |
|                                   | Yes                               | 2.20          | (1.31-3.68)  |
| Mother smoker                     | No                                | 1.00          |              |
|                                   | Yes                               | 1.61          | (0.82-2.81)  |
| Personal smoking habits           | Never                             | 1.00          |              |
|                                   | Occasionally                      | 2.45          | (1.26-4.77)  |
|                                   | Daily                             | 11.86         | (6.50-21.65) |
| Use of snus                       | Never                             | 1.00          |              |
|                                   | Occasionally                      | 5.60          | (2.07-15.14) |
|                                   | Daily                             | 4.46          | (2.12-9.39)  |
| Parental socioeconomic status     | Professionals and executives      | 1.00          |              |
|                                   | Self-employed                     | 1.03          | (0.34-3.15)  |
|                                   | Intermediate non manual employees | 1.18          | (0.62-2.24)  |
|                                   | Assistant non-manual employees    | 1.07          | (0.47-2.47)  |
|                                   | Manual workers in industry        | 1.78          | (0.87-3.61)  |
|                                   | Manual workers in service         | 1.91          | (0.92-3.98)  |
|                                   | Unemployed                        | Too few cases |              |
| Single parent household           | No                                | 1.00          |              |
|                                   | Yes                               | 1.14          | (0.58-2.25)  |
| Current asthma at age 14-15 years | No                                | 1.00          |              |
|                                   | Yes                               | 0.87          | (0.43-1.76)  |
| <i>Factors at age 19 years</i>    |                                   |               |              |
| Physical activity                 | No                                | 1.00          |              |
|                                   | Yes                               | 0.56          | (0.37-0.86)  |
| Healthy diet                      | Entered as a continuous variable  | 0.64          | (0.53-0.78)  |
